# Supplementary material for: Selective hydrogenation of guaiacol to 2-methoxycyclohexanone over supported Pd catalysts
Source: Royal Society of Chemistry journal article supplement (doi:10.1039/d4gc03793f), 2024-01-01
Supplement: d4gc03793f1.pdf [file d4gc03793f1.pdf]

## Supporting Information

### **Selective hydrogenation of guaiacol to 2-methoxycyclohexanone over supported Pd catalysts**

Yota Taniwaki,<sup>[a]</sup> Yoshinao Nakagawa,<sup>\*[a][b]</sup> Mizuho Yabushita,<sup>[a][b]</sup> and Keiichi Tomishige<sup>\*[a][b][c]</sup>

[a] Department of Applied Chemistry, School of Engineering, Tohoku University

6-6-07 Aoba, Aramaki, Aoba-ku, Sendai, Miyagi 980-8579 (Japan)

[b] Research Center for Rare Metal and Green Innovation, Tohoku University,

468-1 Aoba, Aramaki, Aoba-ku, Sendai, Miyagi, 980-0845 (Japan)

[c] Advanced Institute for Materials Research (WPI-AIMR), Tohoku University,

2-1-1 Katahira, Aoba-ku, Sendai, Miyagi, 980-8577 (Japan)

[\*] Email: yoshinao@erec.che.tohoku.ac.jp

tomishige@tohoku.ac.jp

**Table S1.** Previous studies on selective hydrogenation of phenol (published after 2020) and methoxyphenols (published after 2010).

| Entry | Substrate | Year of publication | Catalyst                                                                            | $n_{\text{metal}}/n_{\text{substrate}}$<br>[mol%] | Temp.<br>[°C] | Time<br>[h] | H <sub>2</sub> pressure<br>[MPa] | Solvent         | Conv.<br>[%] | Yield<br>[%] | Ref. |
|-------|-----------|---------------------|-------------------------------------------------------------------------------------|---------------------------------------------------|---------------|-------------|----------------------------------|-----------------|--------------|--------------|------|
| 1     | Phenol    | 2024                | Pd/ACET                                                                             | 0.2                                               | 343           | 3           | 0.1                              | Water           | 97.3         | 97.2         | S1   |
| 2     |           | 2023                | Pd <sup>2+</sup> @CN                                                                | 1.2                                               | 373           | 0.5         | 0.1                              | Cyclohexane     | 99           | 93           | S2   |
| 3     |           | 2023                | Pd <sub>4.85</sub> Ru <sub>0.15</sub> /ZrHP                                         | 0.3                                               | 373           | 1           | 0.1                              | Cyclohexane     | 97.9         | 97.0         | S3   |
| 4     |           | 2023                | Pd@mCeO <sub>2</sub>                                                                | 1.9                                               | 353           | 0.83        | 1                                | Dichloromethane | 96.3         | 91.8         | S4   |
| 5     |           | 2023                | Pd-Co <sub>0.3</sub> /mSiO <sub>2</sub>                                             | 9.1                                               | 353           | 1           | 1                                | Dichloromethane | 100          | 95           | S5   |
| 6     |           | 2022                | Ni@C-400                                                                            | 0.03                                              | 393           | 2           | 2                                | Water           | 100          | 100          | S6   |
| 7     |           | 2022                | Pd@CNFs-0.3                                                                         | 1.77                                              | 358           | 1           | 0.1                              | Cyclohexane     | 97.8         | 90.7         | S7   |
| 8     |           | 2022                | Rh-CoO <sub>x</sub> /SiO <sub>2</sub>                                               | 0.4                                               | 333           | 1.7         | 1                                | EtOH            | 98.1         | 97.5         | S8   |
| 9     |           | 2022                | Pt@Al <sub>3</sub> -mSiO <sub>2</sub>                                               | 1.2                                               | 383           | 1.5         | 1                                | Dichloromethane | 100          | 96           | S9   |
| 10    |           | 2021                | Pd@HMSNs                                                                            | 3.2                                               | 323           | 4           | 0.1                              | Water           | 99           | 97           | S10  |
| 11    |           | 2021                | Pd@mpg-C <sub>3</sub> N <sub>4</sub>                                                | 5.0                                               | 373           | 1           | 0.1                              | Water           | 99           | 98           | S11  |
| 12    |           | 2021                | Pd@CN-H                                                                             | 0.8                                               | 353           | 0.83        | 0.1                              | Cyclohexane     | 99.8         | 90.7         | S12  |
| 13    |           | 2021                | Pd/NH <sub>2</sub> -SBA-15                                                          | 2.0                                               | 353           | 2           | 0.1                              | Water           | 98.0         | 97.6         | S13  |
| 14    |           | 2021                | Pd/pol-NH <sub>2</sub>                                                              | 5.0                                               | 373           | 2           | 0.3                              | Water           | 99.5         | 99.0         | S14  |
| 15    |           | 2020                | Pd/Al <sub>2</sub> O <sub>3</sub> -La <sub>2</sub> O <sub>3</sub> -CeO <sub>2</sub> | 0.9                                               | 353           | 6           | 0.3                              | Cyclohexane     | 99.8         | 96.1         | S15  |
| 16    |           | 2020                | Pd@CN-rGO-15                                                                        | 2.1                                               | 353           | 1.3         | 0.1                              | Water           | 97.2         | 94.0         | S16  |
| 17    |           | 2020                | NiCo/Mg <sub>x</sub> Ni <sub>y</sub> O                                              | 7.0                                               | 453           | 2.5         | 2                                | Hexane          | 99.9         | 99.8         | S17  |
| 18    |           | 2020                | Rh@HMSNs                                                                            | 0.03                                              | 318           | 3           | 0.5                              | EtOH            | 90.6         | 87.5         | S18  |
| 19    |           |                     |                                                                                     | Pd/TiO <sub>2</sub>                               | 0.6           | 373         | 1                                | 1 (r.t.)        | Water        | 99.4         | 91.4 |

| Entry | Substrate            | Year of publication | Catalyst                                                               | $n_{\text{metal}}/n_{\text{substrate}}$<br>[mol%] | Temp.<br>[°C] | Time<br>[h] | H <sub>2</sub> pressure<br>[MPa] | Solvent                 | Conv.<br>[%] | Yield<br>[%] | Ref.      |
|-------|----------------------|---------------------|------------------------------------------------------------------------|---------------------------------------------------|---------------|-------------|----------------------------------|-------------------------|--------------|--------------|-----------|
| 20    | 4-Methoxy-phenol     | 2022                | Rh-CoO <sub>x</sub> /SiO <sub>2</sub>                                  | 1.2                                               | 100           | 24          | 1                                | EtOH                    | 76.9         | 72.7         | S8        |
| 21    |                      | 2018                | Rh/SiO <sub>2</sub>                                                    | 0.5                                               | 25            | 28          | 0.2                              | Cyclohexane             | 99           | 75           | S19       |
| 22    |                      | 2018                | RuO <sub>2</sub> -MCM-41                                               | 0.3                                               | 100           | 24          | 1                                | Water                   | 100          | 20           | S20       |
| 23    |                      | 2016                | Rh@SiCN                                                                | 2.0                                               | 25            | 11          | 0.6                              | Water                   | 95           | 38           | S21       |
| 24    |                      | 2015                | Pd/HAP                                                                 | 2.0                                               | 75            | 3.5         | 0.1                              | Water                   | 100          | 100          | S22       |
| 25    |                      | 2013                | Pd/IL-like copolymer + H <sub>3</sub> PW <sub>12</sub> O <sub>40</sub> | 10                                                | 100           | 18          | 0.2                              | Water                   | 100          | 45           | S23       |
| 26    |                      | Pd/TiO <sub>2</sub> | 0.6                                                                    | 100                                               | 16            | 1 (r.t.)    | Water                            | 90.9                    | 85.2         | this work    |           |
| 27    | Guaiacol             | 2024                | Rh/C                                                                   | 0.3                                               | 40            | 3           | 1                                | Water                   | -            | 26.1         | S24       |
| 28    |                      | 2018                | Ru-MCM-41                                                              | 0.3                                               | 100           | 24          | 1                                | Water                   | 95           | 19           | S20       |
| 29    |                      | 2018                | MPF-PPI-G3-Pd                                                          | 2.3                                               | 200           | 3           | 5                                | Water                   | 75           | 21           | S25       |
| 30    |                      | 2017                | m-Pd/C                                                                 | 2.1                                               | 130           | 15          | 2                                | Dichloromethane + water | 100          | 10.2         | S26       |
| 31    |                      | 2016                | Pd/ $\gamma$ -Al <sub>2</sub> O <sub>3</sub>                           | 6.9                                               | 60            | 12          | 2                                | Water                   | 56.9         | 33.2         | S27       |
| 32    |                      | 2016                | Rh@SiCN                                                                | 2.0                                               | 25            | 15          | 0.6                              | Water                   | 90           | 36           | S21       |
| 33    |                      | 2015                | Pd/HAP                                                                 | 2.0                                               | 75            | 24          | 0.1                              | Water                   | 37.2         | 37           | S22       |
| 34    |                      | Pd/TiO <sub>2</sub> | 0.6                                                                    | 100                                               | 1.5           | 1 (r.t.)    | Water                            | 93.8                    | 64.3         | This work    |           |
| 35    | 2,6-Dimethoxy-phenol | 2015                | Pd/HAP                                                                 | 2.0                                               | 75            | 24          | 0.1                              | Water                   | 0.5          | 0            | S22       |
| 36    |                      |                     | Pd/TiO <sub>2</sub>                                                    | 0.6                                               | 100           | 24          | 1 (r.t.)                         | Water                   | 28.8         | 7.2          | This work |

Abbreviations: ACET = acetylene black; HMSN = hollow mesoporous silica nanoreactors; rGO = reduced graphene oxide, HAP = hydroxyapatite, MPF-PPI-G3 = mesoporous phenol formaldehyde polymer modified with a third generation poly(propylene imine) dendrimer.

**Table S2.** List of reagents used in this study.

| reagent                                           | Supplier                          | Purity [%] |
|---------------------------------------------------|-----------------------------------|------------|
| PdCl <sub>2</sub>                                 | FUJIFILM Wako Pure Chemical Co.   | > 99.0     |
| Pd(OCOCH <sub>3</sub> ) <sub>2</sub>              | FUJIFILM Wako Pure Chemical Co.   | > 97.0     |
| Pd(NO <sub>3</sub> ) <sub>2</sub>                 | FUJIFILM Wako Pure Chemical Co.   | 99.9       |
| Pd(acac) <sub>2</sub>                             | FUJIFILM Wako Pure Chemical Co.   | > 98.0     |
| Pd(NH <sub>3</sub> ) <sub>4</sub> Cl <sub>2</sub> | Sigma-Aldrich Co.                 | > 98.0     |
| Acetone                                           | FUJIFILM Wako Pure Chemical Co.   | > 99.5     |
| Guaiacol                                          | Tokyo Chemical Industry Co., Ltd. | > 98.0     |
| 1,4-Dioxane                                       | FUJIFILM Wako Pure Chemical Co.   | > 99.5     |
| 2-Methoxyethanol                                  | FUJIFILM Wako Pure Chemical Co.   | > 99.0     |
| 2-Methoxycyclohexanone                            | Tokyo Chemical Industry Co., Ltd. | > 95.0     |
| (1 <i>S</i> ,2 <i>S</i> )-(+)-Methoxycyclohexanol | Alfa Aesar Co.                    | > 97.0     |
| Cyclohexanone                                     | FUJIFILM Wako Pure Chemical Co.   | > 99.0     |
| Cyclohexanol                                      | FUJIFILM Wako Pure Chemical Co.   | > 98.0     |
| Phenol                                            | FUJIFILM Wako Pure Chemical Co.   | > 99.0     |
| Methanol                                          | Kanto Chemical Co., Inc.          | > 99.8     |
| Methoxycyclohexane                                | Tokyo Chemical Industry Co., Ltd. | > 98.0     |
| Anisole                                           | Tokyo Chemical Industry Co., Ltd. | > 99.0     |
| 2-Hydroxycyclohexanone                            | Sigma-Aldrich Co.                 | > 97.0     |
| Hydrochloric acid                                 | FUJIFILM Wako Pure Chemical Co.   | 35.0-37.0  |
| Sulfuric acid                                     | FUJIFILM Wako Pure Chemical Co.   | > 95.0     |
| Ethanol                                           | Kanto Chemical Co., Inc.          | > 99.5     |
| 2-Propanol                                        | FUJIFILM Wako Pure Chemical Co.   | > 99.7     |
| Tetrahydrofuran                                   | FUJIFILM Wako Pure Chemical Co.   | > 99.5     |
| Cyclohexane                                       | FUJIFILM Wako Pure Chemical Co.   | > 98.0     |
| Dodecane                                          | Tokyo Chemical Industry Co., Ltd. | > 99.0     |
| Toluene                                           | FUJIFILM Wako Pure Chemical Co.   | > 99.5     |
| Toluene- <i>d</i> <sub>8</sub>                    | FUJIFILM Wako Pure Chemical Co.   | 99.5       |
| 4-Methoxyphenol                                   | Tokyo Chemical Industry Co., Ltd. | > 99.0     |
| 2-Ethoxyphenol                                    | Tokyo Chemical Industry Co., Ltd. | > 99.0     |
| Catechol                                          | FUJIFILM Wako Pure Chemical Co.   | > 99.0     |
| <i>o</i> -Cresol                                  | Tokyo Chemical Industry Co., Ltd. | > 99.0     |
| 2-(Trifluoromethyl)phenol                         | Tokyo Chemical Industry Co., Ltd. | > 98.0     |
| 2,6-Dimethoxyphenol                               | FUJIFILM Wako Pure Chemical Co.   | > 98.0     |

**Table S3.** List of supports tested in this study.

| Support                                  | Supplier                               | BET surface area [m <sup>2</sup> g <sup>-1</sup> ] | Detail information             |
|------------------------------------------|----------------------------------------|----------------------------------------------------|--------------------------------|
| $\alpha$ -Al <sub>2</sub> O <sub>3</sub> | FUJIFILM Wako Pure Chemical Co.        | 7.9                                                | -                              |
| BN                                       | FUJIFILM Wako Pure Chemical Co.        | 7.5                                                | -                              |
| H-ZSM-5                                  | Tosoh Co.                              | 100                                                | HSZ-822HOA (Si/Al=12)          |
| CeO <sub>2</sub>                         | Daiichi Kigenso Kagaku Kogyo Co., Ltd. | 78                                                 | HS, calcined at 873 K for 3 h. |
| SiO <sub>2</sub>                         | FUJI SILYSIA Chemical Ltd.             | 402                                                | G6, calcined at 773 K for 1 h. |
| Nb <sub>2</sub> O <sub>5</sub>           | FUJIFILM Wako Pure Chemical Co.        | 5.0                                                | -                              |
| TiO <sub>2</sub> (anatase)               | Sakai Chemical Industry Co., Ltd.      | 206                                                | SSP-N-Anatase                  |
| TiO <sub>2</sub> (rutile)                | FUJIFILM Wako Pure Chemical Co.        | 5.8                                                | -                              |
| TiO <sub>2</sub> (P25)                   | Aeroxide Co.                           | 50                                                 | P25                            |
| Activated carbon                         | Osaka Gas Chemicals Co., Ltd.          | 779                                                | Shirasagi FAC-10               |
| Carbon black                             | Cabot Co.                              | 1280                                               | Black Pearls 2000              |
| Hydroxyapatite                           | FUJIFILM Wako Pure Chemical Co.        | 7.5                                                | Monoclinic                     |

**Table S4.** Hydrogenation of guaiacol over Pd catalysts with various supports.<sup>a</sup>

| Support                                  | Dispersion <sup>b</sup><br>[%] | Conv.<br>[%] | Yield (C-based) [%] |                        |                          | CHone | MeO<br>CHane | Phenol | CHol | Anisole | 2-HCO | MeOH | C. B.<br>[%] |
|------------------------------------------|--------------------------------|--------------|---------------------|------------------------|--------------------------|-------|--------------|--------|------|---------|-------|------|--------------|
|                                          |                                |              | 2-MCO               | <i>cis</i> -<br>2-MCol | <i>trans</i> -<br>2-MCol |       |              |        |      |         |       |      |              |
| $\alpha$ -Al <sub>2</sub> O <sub>3</sub> | 13.5                           | 16.2         | 9.6                 | 0.3                    | 0.1                      | 1.3   | 0.0          | 0.3    | 0.0  | 0.2     | 0.0   | 0.2  | 95.8         |
| BN                                       | 6.5                            | 8.1          | 3.2                 | 0.5                    | 0.3                      | 0.1   | 0.0          | 0.1    | 0.0  | 0.0     | 0.2   | 0.0  | 96.2         |
| H-ZSM-5                                  | 19.2                           | 23.5         | 0.3                 | 5.8                    | 9.1                      | 3.4   | 0.2          | 0.2    | 0.2  | 0.5     | 0.2   | 2.0  | 98.6         |
| CeO <sub>2</sub>                         | 57.6                           | 56.4         | 20.8                | 9.3                    | 4.5                      | 9.0   | 0.5          | 0.5    | 5.5  | 0.2     | 0.0   | 2.3  | 95.7         |
| SiO <sub>2</sub>                         | 29.4                           | 45.0         | 33.0                | 4.8                    | 1.9                      | 4.6   | 0.1          | 0.1    | 0.1  | 0.5     | 1.1   | 1.0  | 103.0        |
| Nb <sub>2</sub> O <sub>5</sub>           | 43.6                           | 13.6         | 6.0                 | 1.3                    | 0.6                      | 0.6   | 0.2          | 0.2    | 0.1  | 0.2     | 0.3   | 0.2  | 96.2         |
| TiO <sub>2</sub> (anatase)               | 24.4                           | 40.6         | 29.6                | 3.6                    | 2.1                      | 2.0   | 0.1          | 0.1    | 0.2  | 0.1     | 0.1   | 0.4  | 97.9         |
| TiO <sub>2</sub> (rutile)                | 15.3                           | 15.3         | 7.2                 | 1.1                    | 0.5                      | 1.0   | 0.3          | 0.3    | 0.1  | 0.5     | 0.4   | 0.2  | 96.1         |
| TiO <sub>2</sub> (P-25)                  | 17.4                           | 33.3         | 24.0                | 2.3                    | 1.0                      | 2.0   | 0.2          | 0.2    | 0.1  | 0.3     | 0.3   | 0.4  | 97.4         |
| Hydroxyapatite                           | 21.4                           | 10.4         | 7.3                 | 0.5                    | 0.2                      | 0.4   | 0.0          | 0.1    | 0.2  | 0.0     | 0.0   | 0.1  | 98.4         |
| Activated carbon                         | 18.2                           | 29.8         | 18.7                | 4.5                    | 1.6                      | 0.3   | 0.1          | 0.1    | 0.1  | 0.0     | 0.2   | 0.1  | 95.9         |
| Carbon black                             | 6.9                            | 4.6          | 0.1                 | 0.0                    | 0.0                      | 0.0   | 0.0          | 0.0    | 0.0  | 0.0     | 0.0   | 0.1  | 95.7         |

<sup>a</sup>Conditions: guaiacol (5 mmol), catalyst (Pd = 3 wt%, 100 mg), water (10 g), 373 K, H<sub>2</sub> (1 MPa at r.t.), 4 h.

2-MCO: 2-methoxycyclohexanone, 2-MCol: 2-methoxycyclohexanol, CHone: cyclohexanone, MeOH: methanol, MeOCHane: methoxycyclohexane, CHol: cyclohexanol, 2-HCO: 2-hydroxycyclohexanone.

$$^b\text{Dispersion (\%)} = \left[ \frac{\text{Amount of CO adsorption}}{\text{Total amount of Pd}} \right] \times 100$$

**Table S5.** Product composition in the selective hydrogenation of guaiacol over Pd catalysts with various supports at similar conversion level.<sup>a</sup>

| Support                          | Dispersion <sup>b</sup><br>[%] | Time<br>[h] | Conv.<br>[%] | Selectivity (C-based) [%] |                        |                          |       |              |        |      |         |       |      | Guaiacol<br>conversion<br>rate<br>[mmol/<br>(g <sub>Pd</sub> · h)] | C. B.<br>[%] |
|----------------------------------|--------------------------------|-------------|--------------|---------------------------|------------------------|--------------------------|-------|--------------|--------|------|---------|-------|------|--------------------------------------------------------------------|--------------|
|                                  |                                |             |              | 2-MCO                     | <i>cis</i> -<br>2-MCol | <i>trans</i> -<br>2-MCol | CHone | MeO<br>CHane | Phenol | CHol | Anisole | 2-HCO | MeOH |                                                                    |              |
| α-Al <sub>2</sub> O <sub>3</sub> | 13.5                           | 5           | 24.4         | 80.5                      | 7.4                    | 3.1                      | 5.0   | 0.1          | 0.8    | 0.5  | 1.2     | 0.3   | 1.0  | 78                                                                 | 97.7         |
| BN                               | 6.5                            | 9           | 19.9         | 67.6                      | 16.6                   | 10.2                     | 1.9   | 0.3          | 0.9    | 0.4  | 0.3     | 1.2   | 0.7  | 30                                                                 | 95.7         |
| CeO <sub>2</sub>                 | 57.6                           | 1.5         | 21.3         | 49.2                      | 10.8                   | 5.6                      | 20.2  | 0.1          | 2.3    | 6.6  | 0.5     | 0.2   | 4.4  | 288                                                                | 104.6        |
| SiO <sub>2</sub>                 | 29.4                           | 2           | 25.9         | 70.2                      | 8.8                    | 3.6                      | 8.8   | 1.7          | 0.6    | 0.3  | 2.0     | 2.2   | 1.8  | 223                                                                | 100.8        |
| Nb <sub>2</sub> O <sub>5</sub>   | 43.6                           | 7           | 17.1         | 70.3                      | 8.3                    | 3.3                      | 8.0   | 1.4          | 1.8    | 0.2  | 2.1     | 2.6   | 2.0  | 29                                                                 | 95.1         |
| TiO <sub>2</sub> (anatase)       | 24.4                           | 2           | 24.0         | 82.8                      | 5.6                    | 3.3                      | 5.4   | 0.5          | 0.5    | 0.5  | 0.5     | 0.0   | 1.0  | 173                                                                | 100.0        |
| TiO <sub>2</sub> (rutile)        | 15.3                           | 4           | 15.3         | 74.0                      | 6.3                    | 3.1                      | 6.8   | 1.0          | 1.4    | 0.1  | 2.6     | 2.8   | 1.8  | 48                                                                 | 96.3         |
| Hydroxyapatite                   | 21.4                           | 8           | 22.6         | 82.5                      | 5.9                    | 3.0                      | 5.4   | 0.4          | 0.5    | 0.1  | 1.8     | 0.5   | 0.7  | 40                                                                 | 96.5         |
| Activated carbon                 | 18.2                           | 3           | 23.0         | 70.8                      | 16.7                   | 6.8                      | 1.7   | 0.3          | 0.1    | 0.3  | 0.0     | 2.8   | 0.4  | 107                                                                | 96.0         |

<sup>a</sup>Conditions: guaiacol (5 mmol), catalyst (Pd = 3 wt%, 100 mg), water (10 g), 373 K, H<sub>2</sub> (1 MPa at r.t.).

2-MCO: 2-methoxycyclohexanone, 2-MCol: 2-methoxycyclohexanol, CHone: cyclohexanone, MeOH: methanol, MeOCHane: methoxycyclohexane, CHol: cyclohexanol, 2-HCO: 2-hydroxycyclohexanone.

$$^b\text{Dispersion (\%)} = \left[ \frac{\text{Amount of CO adsorption}}{\text{Total amount of Pd}} \right] \times 100$$

**Table S6.** Time courses of selective hydrogenation of guaiacol over supported Pd catalysts.<sup>a</sup>

| Catalyst                      | Time [h] | Conv. [%] | Yield (C-based) [%] |                    |                      |     |     | CHone | MeOCHane | Phenol | CHol | Anisole | 2-HCO | MeOH  | 2-MCO sel. [%] | C.B. [%] |
|-------------------------------|----------|-----------|---------------------|--------------------|----------------------|-----|-----|-------|----------|--------|------|---------|-------|-------|----------------|----------|
|                               |          |           | 2-MCO               | <i>cis</i> -2-MCol | <i>trans</i> -2-MCol |     |     |       |          |        |      |         |       |       |                |          |
| TiO <sub>2</sub><br>(anatase) | 0        | 5.3       | 1.6                 | 0.1                | 0.1                  | 0.1 | 0.0 | 0.1   | 0.0      | 0.0    | 0.0  | 0.0     | 0.0   | 80.0  | 96.8           |          |
|                               | 2        | 24.0      | 16.8                | 1.1                | 0.7                  | 1.1 | 0.1 | 0.1   | 0.1      | 0.1    | 0.1  | 0.0     | 0.2   | 82.8  | 96.4           |          |
|                               | 4        | 40.6      | 29.6                | 3.6                | 2.1                  | 2.0 | 0.2 | 0.1   | 0.2      | 0.1    | 0.1  | 0.1     | 0.4   | 77.1  | 97.9           |          |
|                               | 6        | 53.5      | 42.3                | 5.0                | 2.7                  | 3.0 | 0.4 | 0.1   | 0.5      | 0.1    | 0.1  | 0.1     | 0.6   | 77.2  | 101.1          |          |
|                               | 8        | 57.6      | 47.3                | 5.5                | 2.8                  | 3.3 | 0.4 | 0.0   | 0.4      | 0.1    | 0.1  | 0.1     | 0.5   | 78.3  | 102.9          |          |
|                               | 12       | 71.0      | 55.6                | 8.0                | 3.9                  | 3.3 | 0.5 | 0.1   | 0.7      | 0.1    | 0.1  | 0.1     | 0.7   | 76.2  | 102.0          |          |
|                               | 16       | 93.8      | 65.1                | 15.4               | 7.5                  | 3.7 | 1.1 | 0.1   | 0.9      | 0.1    | 0.1  | 0.1     | 1.1   | 68.5  | 101.3          |          |
|                               | 20       | 96.6      | 56.9                | 21.8               | 10.5                 | 4.3 | 1.0 | 0.1   | 1.7      | 0.0    | 0.0  | 0.0     | 1.0   | 58.5  | 100.8          |          |
| 24                            | 99.9     | 7.6       | 49.0                | 33.1               | 1.5                  | 1.3 | 0.1 | 6.3   | 0.0      | 0.0    | 0.0  | 1.2     | 7.6   | 100.3 |                |          |
| SiO <sub>2</sub>              | 0        | 7.1       | 3.2                 | 0.3                | 0.2                  | 0.2 | 0.0 | 0.1   | 0.0      | 0.0    | 0.0  | 0.0     | 0.1   | 78.0  | 97.3           |          |
|                               | 2        | 31.1      | 22.6                | 2.5                | 1.1                  | 2.5 | 0.5 | 0.1   | 0.1      | 0.6    | 0.6  | 0.6     | 0.5   | 72.7  | 99.8           |          |
|                               | 4        | 45.0      | 33.0                | 4.7                | 2.0                  | 4.6 | 0.9 | 0.1   | 0.1      | 0.5    | 1.1  | 1.0     | 1.0   | 68.8  | 103.0          |          |
|                               | 6        | 67.0      | 49.7                | 7.7                | 3.5                  | 6.2 | 1.4 | 0.1   | 0.4      | 0.3    | 1.4  | 1.2     | 1.2   | 69.1  | 104.8          |          |
|                               | 8        | 81.1      | 56.6                | 9.6                | 4.5                  | 8.4 | 1.7 | 0.1   | 0.7      | 0.2    | 1.9  | 1.6     | 1.6   | 66.4  | 104.1          |          |
|                               | 10       | 95.4      | 59.8                | 12.3               | 7.1                  | 8.9 | 1.9 | 0.1   | 1.6      | 0.1    | 1.9  | 2.0     | 2.0   | 62.5  | 100.3          |          |
|                               | 12       | 99.6      | 53.3                | 19.2               | 11.5                 | 9.7 | 2.3 | 0.3   | 2.5      | 0.1    | 2.0  | 2.2     | 2.2   | 51.7  | 103.4          |          |
|                               | 16       | 99.8      | 22.8                | 36.5               | 24.2                 | 5.7 | 2.3 | 0.9   | 6.3      | 0.0    | 0.9  | 2.3     | 2.3   | 22.4  | 102.1          |          |
| Activated carbon              | 0        | 3.7       | 1.2                 | 0.1                | 0.1                  | 0.0 | 0.0 | 0.1   | 0.0      | 0.0    | 0.0  | 0.0     | 0.0   | 80.0  | 97.8           |          |
|                               | 4        | 29.8      | 18.7                | 4.5                | 1.6                  | 0.3 | 0.0 | 0.1   | 0.1      | 0.0    | 0.2  | 0.1     | 0.1   | 73.0  | 95.9           |          |
|                               | 9        | 65.7      | 41.8                | 14.1               | 6.2                  | 1.0 | 0.2 | 0.0   | 0.3      | 0.0    | 1.8  | 0.4     | 0.4   | 63.5  | 100.2          |          |
|                               | 13       | 83.2      | 47.9                | 23.0               | 10.9                 | 1.5 | 0.5 | 0.0   | 0.7      | 0.0    | 2.5  | 0.7     | 0.7   | 54.6  | 104.3          |          |
|                               | 17       | 96.5      | 51.2                | 23.5               | 20.1                 | 1.6 | 0.5 | 0.1   | 0.9      | 0.1    | 1.7  | 0.8     | 0.8   | 50.9  | 104.0          |          |
|                               | 20.5     | 97.5      | 33.7                | 37.9               | 20.1                 | 1.7 | 0.7 | 0.3   | 1.7      | 0.0    | 2.0  | 0.9     | 0.9   | 34.0  | 101.5          |          |
|                               | 24       | 99.7      | 0.9                 | 54.9               | 34.6                 | 3.6 | 0.7 | 0.9   | 3.4      | 0.0    | 0.0  | 1.0     | 1.0   | 0.9   | 100.3          |          |

<sup>a</sup>Conditions: guaiacol (5 mmol), catalyst (Pd = 3 wt%, 100 mg), water (10 g), 373 K, H<sub>2</sub> (1 MPa at r.t.).

2-MCO: 2-methoxycyclohexanone, 2-MCol: 2-methoxycyclohexanol, CHone: cyclohexanone, MeOH: methanol, MeOCHane: methoxycyclohexane, CHol: cyclohexanol, 2-HCO: 2-hydroxycyclohexanone.



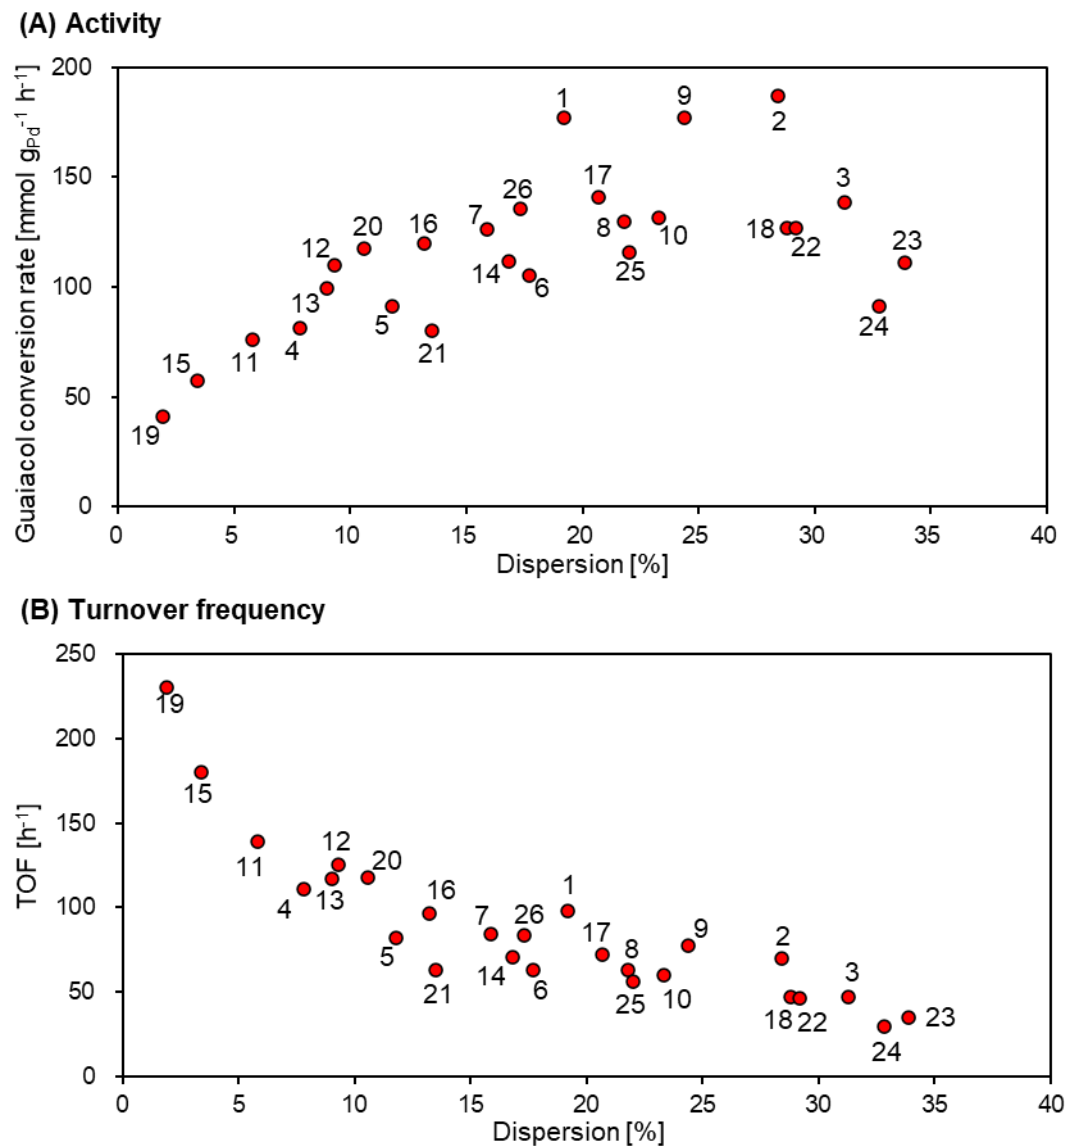

**Figure S1.** Correlation between Pd dispersion and catalytic activity for selective hydrogenation of guaiacol over Pd/TiO<sub>2</sub> catalyst.

All data involved in this figure are listed in Table S7.

Conditions: guaiacol (5 mmol), catalyst (100 mg), water (10 g), 373 K, H<sub>2</sub> (1 MPa at r.t.).

**Table S7.** Correlation between Pd dispersion and product selectivity for selective hydrogenation of guaiacol over Pd/TiO<sub>2</sub> catalyst.<sup>a</sup>

| Entry | Pd loading [wt%] | Pd precursor                                      | Calcination temp. [K] | <i>D</i> <sup>b</sup> [%] | Time [h] | Conv. [%] | Yield (C-based) [%] |                    |                      |       |           |        |      | Guaiacol conv. rate [mmol/(g <sub>Pd</sub> • h)] | C.B. [%] |         |       |       |
|-------|------------------|---------------------------------------------------|-----------------------|---------------------------|----------|-----------|---------------------|--------------------|----------------------|-------|-----------|--------|------|--------------------------------------------------|----------|---------|-------|-------|
|       |                  |                                                   |                       |                           |          |           | 2-MCO               | <i>cis</i> -2-MCol | <i>trans</i> -2-MCol | CHone | MeO CHane | Phenol | CHol |                                                  |          | Anisole | 2-HCO | MeOH  |
| 1     | 5.1              | Pd(acac) <sub>2</sub>                             | 573                   | 19.2                      | 1        | 19.8      | 14.5                | 1.0                | 0.6                  | 1.0   | 0.1       | 0.1    | 0.1  | 0.1                                              | 0.1      | 0.1     | 177   | 97.8  |
| 2     | 2.9              |                                                   | 573                   | 28.4                      | 2        | 22.7      | 17.8                | 1.3                | 0.6                  | 1.2   | 0.1       | 0.1    | 0.1  | 0.1                                              | 0.0      | 0.3     | 187   | 99.0  |
| 3     | 1.0              |                                                   | 573                   | 31.3                      | 8        | 23.5      | 17.4                | 1.3                | 0.7                  | 1.4   | 0.2       | 0.1    | 0.1  | 0.1                                              | 0.0      | 0.3     | 138   | 98.2  |
| 4     | 5.5              |                                                   | 773                   | 7.8                       | 2        | 16.6      | 15.0                | 0.9                | 0.5                  | 0.8   | 0.1       | 0.1    | 0.0  | 0.2                                              | 0.1      | 0.2     | 81    | 101.2 |
| 5     | 2.7              |                                                   | 773                   | 11.8                      | 4        | 22.0      | 15.2                | 1.3                | 0.9                  | 1.0   | 0.1       | 0.1    | 0.0  | 0.1                                              | 0.1      | 0.2     | 91    | 97.0  |
| 6     | 1.0              |                                                   | 773                   | 17.7                      | 8        | 20.5      | 13.7                | 0.7                | 0.4                  | 1.0   | 0.0       | 0.1    | 0.0  | 0.2                                              | 0.1      | 0.2     | 105   | 96.0  |
| 7     | 9.1              | Pd(OAc) <sub>2</sub>                              | 573                   | 15.9                      | 2        | 21.8      | 16.1                | 1.2                | 0.6                  | 1.5   | 0.1       | 0.2    | 0.0  | 0.1                                              | 0.0      | 0.2     | 126   | 98.2  |
| 8     | 5.3              |                                                   | 573                   | 21.8                      | 1.5      | 19.4      | 16.2                | 1.3                | 0.7                  | 1.3   | 0.1       | 0.1    | 0.1  | 0.1                                              | 0.0      | 0.2     | 130   | 100.8 |
| 9     | 2.9              |                                                   | 573                   | 24.4                      | 2        | 24.0      | 16.8                | 1.1                | 0.7                  | 1.1   | 0.1       | 0.1    | 0.1  | 0.1                                              | 0.0      | 0.2     | 177   | 96.3  |
| 10    | 1.1              |                                                   | 573                   | 23.3                      | 7        | 19.7      | 16.3                | 1.2                | 0.7                  | 1.0   | 0.1       | 0.1    | 0.1  | 0.1                                              | 0.1      | 0.2     | 131   | 100.2 |
| 11    | 10.9             |                                                   | 773                   | 5.8                       | 3        | 24.9      | 17.3                | 1.7                | 0.9                  | 1.2   | 0.1       | 0.1    | 0.0  | 0.1                                              | 0.3      | 0.2     | 76    | 97.1  |
| 12    | 4.8              |                                                   | 773                   | 9.3                       | 2        | 24.1      | 17.1                | 1.5                | 0.5                  | 1.1   | 0.1       | 0.1    | 0.1  | 0.2                                              | 0.1      | 0.3     | 110   | 97.1  |
| 13    | 2.8              |                                                   | 773                   | 9.0                       | 3        | 21.0      | 13.8                | 0.6                | 0.3                  | 0.7   | 0.0       | 0.1    | 0.1  | 0.1                                              | 0.1      | 0.1     | 99    | 95.2  |
| 14    | 1.0              |                                                   | 773                   | 16.8                      | 8        | 20.8      | 13.8                | 1.3                | 0.8                  | 0.9   | 0.0       | 0.1    | 0.1  | 0.1                                              | 0.1      | 0.1     | 111   | 96.4  |
| 15    | 10.7             | Pd(NO <sub>3</sub> ) <sub>2</sub>                 | 573                   | 3.4                       | 3        | 20.1      | 14.7                | 1.3                | 0.7                  | 0.9   | 0.1       | 0.1    | 0.0  | 0.0                                              | 0.0      | 0.2     | 57    | 97.9  |
| 16    | 5.6              |                                                   | 573                   | 13.2                      | 2        | 25.0      | 21.8                | 1.9                | 1.1                  | 1.4   | 0.2       | 0.1    | 0.1  | 0.1                                              | 0.1      | 0.1     | 120   | 101.8 |
| 17    | 2.8              |                                                   | 573                   | 20.7                      | 3        | 21.7      | 18.7                | 1.5                | 1.0                  | 1.2   | 0.1       | 0.1    | 0.1  | 0.1                                              | 0.1      | 0.2     | 141   | 101.3 |
| 18    | 1.1              |                                                   | 573                   | 28.8                      | 8        | 19.5      | 17.8                | 1.5                | 0.9                  | 1.3   | 0.1       | 0.2    | 0.1  | 0.1                                              | 0.1      | 0.2     | 127   | 102.6 |
| 19    | 11.3             |                                                   | 773                   | 1.9                       | 3        | 18.3      | 10.8                | 1.2                | 0.6                  | 0.7   | 0.0       | 0.2    | 0.0  | 0.1                                              | 0.4      | 0.2     | 41    | 95.9  |
| 20    | 5.7              |                                                   | 773                   | 10.6                      | 2        | 24.1      | 20.7                | 1.8                | 0.8                  | 1.4   | 0.4       | 0.2    | 0.1  | 0.3                                              | 0.6      | 0.1     | 117   | 102.1 |
| 21    | 2.9              |                                                   | 773                   | 13.5                      | 4        | 21.9      | 14.4                | 1.2                | 0.7                  | 1.1   | 0.2       | 0.2    | 0.1  | 0.2                                              | 0.1      | 0.2     | 80    | 96.5  |
| 22    | 1.0              |                                                   | 773                   | 29.2                      | 7        | 19.0      | 13.9                | 1.2                | 1.0                  | 0.9   | 0.0       | 0.1    | 0.1  | 0.1                                              | 0.1      | 0.1     | 127   | 98.6  |
| 23    | 5.0              | PdCl <sub>2</sub>                                 | 573                   | 33.9                      | 2        | 21.7      | 16.0                | 1.1                | 0.4                  | 2.0   | 0.1       | 0.2    | 0.1  | 0.2                                              | 1.4      | 0.6     | 111   | 100.3 |
| 24    | 4.9              |                                                   | 773                   | 32.8                      | 2        | 19.1      | 12.3                | 0.6                | 0.4                  | 2.0   | 0.1       | 0.1    | 0.1  | 0.2                                              | 1.5      | 0.2     | 91    | 98.4  |
| 25    | 4.7              | Pd(NH <sub>3</sub> ) <sub>4</sub> Cl <sub>2</sub> | 573                   | 22.0                      | 2        | 22.8      | 15.6                | 1.0                | 0.5                  | 2.3   | 0.1       | 0.1    | 0.0  | 0.1                                              | 1.4      | 0.4     | 116   | 98.7  |
| 26    | 5.1              |                                                   | 773                   | 17.3                      | 1.5      | 22.3      | 14.3                | 1.1                | 0.4                  | 2.1   | 0.1       | 0.2    | 0.0  | 0.2                                              | 1.5      | 0.3     | 136   | 97.8  |

<sup>a</sup>Conditions: guaiacol (5 mmol), Pd/TiO<sub>2</sub> (100 mg), water (10 g), 373 K, H<sub>2</sub> (1 MPa at r.t.).

2-MCO: 2-methoxycyclohexanone, 2-MCol: 2-methoxycyclohexanol, CHone: cyclohexanone, MeOH: methanol, MeOCHane: methoxycyclohexane, CHol: cyclohexanol, 2-HCO: 2-hydroxycyclohexanone.

$$^b\text{Dispersion (\%)} = \left[ \frac{\text{Amount (mol) of adsorbed CO}}{\text{Total amount (mol) of Pd}} \right] \times 100$$

**Table S8.** Effect of chloride ion on selective hydrogenation of guaiacol over Pd/TiO<sub>2</sub> catalyst.<sup>a</sup>

| Entry | Time [h] | Additive                       | n <sub>additive</sub> /n <sub>Pd</sub> [mol/mol] | Conv. [%] | Yield (C-based) [%] |                    |                      |       |           |        |      |         | 2-MCO sel. [%] | C.B. [%] |       |       |
|-------|----------|--------------------------------|--------------------------------------------------|-----------|---------------------|--------------------|----------------------|-------|-----------|--------|------|---------|----------------|----------|-------|-------|
|       |          |                                |                                                  |           | 2-MCO               | <i>cis</i> -2-MCOl | <i>trans</i> -2-MCOl | CHone | MeO CHane | Phenol | CHol | Anisole |                |          | 2-HCO | MeOH  |
| 1     | 4        | H <sub>2</sub> SO <sub>4</sub> | 1.7                                              | 42.3      | 31.2                | 4.8                | 2.1                  | 1.6   | 0.1       | 0.1    | 1.6  | 0.1     | 0.1            | 0.2      | 75.4  | 99.1  |
| 2     | 4        | HCl                            | 1.3                                              | 50.0      | 35.1                | 4.1                | 1.5                  | 5.0   | 0.8       | 0.1    | 5.0  | 0.1     | 0.8            | 0.2      | 69.9  | 100.2 |
| 3     | 4        | HCl                            | 3.3                                              | 61.3      | 38.2                | 3.5                | 2.0                  | 8.0   | 0.9       | 0.1    | 8.0  | 0.2     | 0.9            | 0.3      | 63.6  | 98.8  |
| 4     | 4        | None                           | 0.0                                              | 40.6      | 29.6                | 3.6                | 2.1                  | 2.0   | 0.2       | 0.1    | 2.0  | 0.1     | 0.2            | 0.2      | 76.1  | 98.3  |
| 5     | 8        | None                           | 0.0                                              | 57.6      | 47.3                | 5.5                | 2.8                  | 3.3   | 0.4       | 0.0    | 0.4  | 0.1     | 0.1            | 0.5      | 78.3  | 102.9 |
| 6     | 12       | None                           | 0.0                                              | 71.0      | 55.6                | 8.0                | 3.9                  | 3.3   | 0.5       | 0.1    | 0.7  | 0.1     | 0.1            | 0.7      | 76.2  | 102.0 |

<sup>a</sup>Conditions: guaiacol (5 mmol), Pd/TiO<sub>2</sub> (Pd = 3 wt%, 100 mg), water (10 g), additive (shown in table), 373 K, H<sub>2</sub> (1 MPa at r.t.).

2-MCO: 2-methoxycyclohexanone, 2-MCOl: 2-methoxycyclohexanol, CHone: cyclohexanone, MeOH: methanol, MeOCHane: methoxycyclohexane, CHol: cyclohexanol, 2-HCO: 2-hydroxycyclohexanone.

**Table S9.** Effect of solvent on selective hydrogenation of guaiacol and 2-methoxycyclohexanone over Pd/TiO<sub>2</sub> catalyst.<sup>a, b</sup>

| Entry | Substrate             | Solvent         | $W_{\text{catalyst}}$<br>[g] | Conv.<br>[%] | Yield (C-based) [%] |                        |                          |       |              |        |      |         |       |      | 2-MCO<br>sel. [%] | C.B.<br>[%] |
|-------|-----------------------|-----------------|------------------------------|--------------|---------------------|------------------------|--------------------------|-------|--------------|--------|------|---------|-------|------|-------------------|-------------|
|       |                       |                 |                              |              | 2-MCO               | <i>cis</i> -<br>2-MCol | <i>trans</i> -<br>2-MCol | CHone | MeO<br>CHane | Phenol | CHol | Anisole | 2-HCO | MeOH |                   |             |
| 1     | Guaiacol <sup>a</sup> | Water           | 0.1                          | 40.6         | 29.6                | 3.6                    | 2.1                      | 2.0   | 0.2          | 0.1    | 0.2  | 0.1     | 0.1   | 0.4  | 77.1              | 97.9        |
| 2     |                       | Methanol        | 0.1                          | 1.5          | 0.0                 | 0.1                    | 0.0                      | 0.0   | 0.0          | 0.1    | 0.0  | 0.0     | 0.0   | -    | 0.0               | 98.7        |
| 3     |                       | Ethanol         | 0.1                          | 8.4          | 4.1                 | 0.8                    | 0.4                      | 0.3   | 0.0          | 0.2    | 0.1  | 0.0     | 0.0   | 0.1  | 68.3              | 97.6        |
| 4     |                       | 2-Propanol      | 0.1                          | 1.5          | 0.4                 | 0.1                    | 0.0                      | 0.0   | 0.0          | 0.1    | 0.0  | 0.0     | 0.1   | 0.0  | 57.1              | 99.2        |
| 5     |                       | Tetrahydrofuran | 0.1                          | 7.2          | 3.2                 | 1.2                    | 0.6                      | 0.5   | 0.0          | 0.4    | 0.6  | 0.1     | 0.0   | 0.2  | 47.1              | 99.7        |
| 6     |                       | Cyclohexane     | 0.1                          | 12.7         | 7.2                 | 2.2                    | 1.1                      | 0.8   | 0.0          | 0.0    | 0.3  | 0.1     | 0.0   | 0.1  | 61.0              | 99.2        |
| 7     |                       | Dodecane        | 0.1                          | 14.9         | 6.1                 | 1.9                    | 1.0                      | 0.4   | 0.0          | 0.0    | 0.2  | 0.1     | 0.0   | 0.0  | 62.9              | 95.9        |
| 8     |                       |                 | 0.3                          | 38.0         | 17.1                | 9.6                    | 5.6                      | 1.4   | 0.0          | 0.0    | 1.1  | 0.1     | 0.0   | 0.2  | 48.7              | 97.1        |
| 9     |                       | No solvent      | 0.1                          | 13.9         | 6.9                 | 2.0                    | 1.0                      | 0.4   | 0.1          | 0.0    | 0.2  | 0.1     | 0.0   | 0.0  | 64.5              | 96.7        |
| 10    | 2-MCO <sup>b</sup>    | Water           | 0.1                          | 53.7         | -                   | 28.2                   | 25.5                     | 0.2   | 0.1          | 0.0    | 0.1  | 0.0     | 0.0   | 0.5  | -                 | 101.4       |
| 11    |                       | Ethanol         | 0.1                          | 34.4         | -                   | 19.2                   | 18.1                     | 0.4   | 0.0          | 0.0    | 0.0  | 0.0     | 0.0   | 0.0  | -                 | 103.3       |
| 12    |                       | Dodecane        | 0.1                          | 76.2         | -                   | 49.1                   | 24.8                     | 0.3   | 0.8          | 0.0    | 0.0  | 0.0     | 0.0   | 1.1  | -                 | 100.0       |
| 13    |                       | No solvent      | 0.1                          | 81.9         | -                   | 45.4                   | 33.7                     | 0.9   | 0.0          | 0.0    | 0.0  | 0.0     | 0.0   | 0.3  | -                 | 98.4        |

<sup>a</sup>Conditions(guaiacol): guaiacol (5 mmol), Pd/TiO<sub>2</sub> (Pd = 3 wt%, 100 mg), solvent (10 g), 373 K, H<sub>2</sub> (1 MPa at r.t.), 4 h.

<sup>b</sup>Conditions(2-MCO): 2-MCO (2 mmol), Pd/TiO<sub>2</sub> (Pd = 3 wt%, 100 mg), solvent (10 g), 373 K, H<sub>2</sub> (1 MPa at r.t.), 2 h.

2-MCO: 2-methoxycyclohexanone, 2-MCol: 2-methoxycyclohexanol, CHone: cyclohexanone, MeOH: methanol, MeOCHane: methoxycyclohexane, CHol: cyclohexanol, 2-HCO: 2-hydroxycyclohexanone.

**Table S10.** Effect of solvent and substrate concentration on selective hydrogenation of guaiacol over Pd/TiO<sub>2</sub> catalyst.<sup>a</sup>

| Entry | Solvent  | Guaiacol conc. [mM] | Reaction time [h] | Conv. [%] | Yield (C based) [%] |        |       |           |        |      |         |       |      | C.B. [%] | Converted substrate amount |                               | Conversion rate         |                               |
|-------|----------|---------------------|-------------------|-----------|---------------------|--------|-------|-----------|--------|------|---------|-------|------|----------|----------------------------|-------------------------------|-------------------------|-------------------------------|
|       |          |                     |                   |           | 2-MCO               | 2-MCOl | CHone | MeO CHane | Phenol | CHol | Anisole | 2-HCO | MeOH |          | [mmol l <sup>-1</sup> ]    | g <sub>Pd</sub> <sup>-1</sup> | [mmol h <sup>-1</sup> ] | g <sub>Pd</sub> <sup>-1</sup> |
| 1     | Water    | 207                 | 0                 | 9.9       | 5.7                 | 0.5    | 0.5   | 0.0       | 0.3    | 0.0  | 0.1     | 0.1   | 0.1  | 97.4     | 50.3                       | 241                           |                         |                               |
| 2     |          | 209                 | 0.08              | 9.3       | 7.9                 | 0.7    | 0.9   | 0.0       | 0.3    | 0.0  | 0.1     | 0.0   | 0.2  | 100.8    | 69.5                       |                               |                         |                               |
| 3     |          | 200                 | 0.25              | 15.8      | 12.9                | 0.9    | 1.7   | 0.0       | 0.2    | 0.0  | 0.2     | 0.0   | 0.3  | 99.5     | 110.6                      |                               |                         |                               |
| 4     |          | 507                 | 0                 | 5.5       | 1.6                 | 0.2    | 0.1   | 0.0       | 0.1    | 0.1  | 0.0     | 0.1   | 0.1  | 96.8     | 39.1                       | 192                           |                         |                               |
| 5     |          | 501                 | 0.25              | 8.8       | 4.5                 | 0.3    | 0.2   | 0.0       | 0.0    | 0.0  | 0.0     | 0.0   | 0.1  | 96.7     | 85.1                       |                               |                         |                               |
| 6     |          | 512                 | 0.50              | 11.3      | 6.8                 | 0.4    | 0.3   | 0.0       | 0.2    | 0.0  | 0.1     | 0.0   | 0.1  | 96.9     | 135.2                      |                               |                         |                               |
| 7     |          | 801                 | 0                 | 1.5       | 0.8                 | 0.0    | 0.1   | 0.0       | 0.0    | 0.0  | 0.0     | 0.0   | 0.1  | 99.6     | 26.5                       | 180                           |                         |                               |
| 8     |          | 801                 | 0.5               | 6.2       | 3.7                 | 0.5    | 0.3   | 0.0       | 0.1    | 0.0  | 0.1     | 0.0   | 0.1  | 98.6     | 128.5                      |                               |                         |                               |
| 9     |          | 809                 | 1                 | 8.7       | 6.2                 | 0.7    | 0.5   | 0.0       | 0.1    | 0.0  | 0.1     | 0.0   | 0.1  | 99.0     | 206.3                      |                               |                         |                               |
| 10    |          | 1611                | 0                 | 0.9       | 0.4                 | 0.0    | 0.0   | 0.0       | 0.0    | 0.0  | 0.0     | 0.0   | 0.0  | 99.7     | 21.5                       | 193                           |                         |                               |
| 11    |          | 1635                | 1                 | 4.7       | 3.1                 | 0.3    | 0.2   | 0.0       | 0.1    | 0.0  | 0.0     | 0.0   | 0.0  | 99.2     | 201.1                      |                               |                         |                               |
| 12    |          | 1624                | 2                 | 6.0       | 6.0                 | 0.7    | 0.5   | 0.0       | 0.1    | 0.0  | 0.1     | 0.0   | 0.1  | 101.5    | 408.1                      |                               |                         |                               |
| 13    | Dodecane | 203                 | 0                 | 1.5       | 1.6                 | 1.1    | 0.3   | 0.0       | 0.0    | 0.0  | 0.0     | 0.0   | 0.0  | 101.5    | 20.1                       | 62.3                          |                         |                               |
| 14    |          | 208                 | 0.5               | 9.1       | 4.0                 | 2.4    | 0.6   | 0.0       | 0.0    | 0.2  | 0.1     | 0.0   | 0.0  | 98.3     | 50.4                       |                               |                         |                               |
| 15    |          | 201                 | 1                 | 15.3      | 6.5                 | 4.0    | 1.1   | 0.0       | 0.0    | 0.6  | 0.1     | 0.0   | 0.1  | 97.1     | 82.4                       |                               |                         |                               |
| 16    |          | 512                 | 0                 | 3.6       | 0.6                 | 0.2    | 0.1   | 0.0       | 0.0    | 0.0  | 0.0     | 0.0   | 0.0  | 97.3     | 15.2                       | 55.0                          |                         |                               |
| 17    |          | 507                 | 2                 | 6.5       | 4.7                 | 2.2    | 0.5   | 0.0       | 0.0    | 0.2  | 0.1     | 0.0   | 0.0  | 101.3    | 128.8                      |                               |                         |                               |
| 18    |          | 511                 | 4                 | 14.9      | 8.1                 | 4.4    | 1.0   | 0.0       | 0.0    | 0.2  | 0.1     | 0.0   | 0.0  | 100.0    | 235.3                      |                               |                         |                               |
| 19    |          | 816                 | 0                 | 1.3       | 0.4                 | 0.1    | 0.0   | 0.0       | 0.0    | 0.0  | 0.5     | 0.0   | 0.0  | 99.8     | 27.1                       | 50.4                          |                         |                               |
| 20    |          | 822                 | 3                 | 8.0       | 4.0                 | 1.7    | 0.3   | 0.0       | 0.0    | 0.1  | 0.1     | 0.0   | 0.0  | 98.2     | 170.0                      |                               |                         |                               |
| 21    |          | 822                 | 5                 | 14.5      | 5.8                 | 3.2    | 0.7   | 0.0       | 0.0    | 0.3  | 0.1     | 0.0   | 0.1  | 95.8     | 280.1                      |                               |                         |                               |

| Entry | Solvent | Guaiacol conc. [mM] | Reaction time [h] | Conv. [%] | Yield (C based) [%] |        |       |           |        |      |         |       | C.B. [%] | Converted substrate amount |                                                       | Conversion rate                                       |  |
|-------|---------|---------------------|-------------------|-----------|---------------------|--------|-------|-----------|--------|------|---------|-------|----------|----------------------------|-------------------------------------------------------|-------------------------------------------------------|--|
|       |         |                     |                   |           | 2-MCO               | 2-MCol | CHone | MeO CHane | Phenol | CHol | Anisole | 2-HCO |          | MeOH                       | [mmol g <sub>Pd</sub> <sup>-1</sup> h <sup>-1</sup> ] | [mmol g <sub>Pd</sub> <sup>-1</sup> h <sup>-1</sup> ] |  |
| 22    | Ethanol | 205                 | 0                 | 0.3       | 0.5                 | 0.1    | 0.0   | 0.0       | 0.1    | 0.0  | 0.0     | 0.0   | 0.1      | 100.6                      | 5.4                                                   | 20.7                                                  |  |
| 23    |         | 199                 | 2                 | 6.1       | 4.5                 | 2.0    | 0.5   | 0.0       | 0.2    | 0.2  | 0.0     | 0.0   | 0.1      | 101.4                      | 49.2                                                  |                                                       |  |
| 24    |         | 201                 | 4                 | 13.9      | 8.0                 | 4.2    | 0.6   | 0.0       | 0.1    | 0.3  | 0.0     | 0.0   | 0.1      | 99.4                       | 99.2                                                  |                                                       |  |
| 25    |         | 503                 | 0                 | 5.0       | 0.3                 | 0.1    | 0.0   | 0.0       | 0.1    | 0.0  | 0.0     | 0.0   | 0.1      | 95.6                       | 10.1                                                  | 25.5                                                  |  |
| 26    |         | 519                 | 4                 | 8.4       | 4.1                 | 0.8    | 0.4   | 0.3       | 0.0    | 0.2  | 0.1     | 0.0   | 0.1      | 97.6                       | 103.1                                                 |                                                       |  |
| 27    |         | 503                 | 8                 | 14.6      | 7.8                 | 2.6    | 1.2   | 0.5       | 0.0    | 0.2  | 0.2     | 0.0   | 0.1      | 98.4                       | 213.8                                                 |                                                       |  |
| 28    |         | 812                 | 0                 | -0.3      | 0.2                 | 0.0    | 0.0   | 0.0       | 0.1    | 0.0  | 0.0     | 0.0   | 0.0      | 100.6                      | 8.1                                                   | 33.0                                                  |  |
| 29    |         | 820                 | 4                 | 5.5       | 3.6                 | 1.3    | 0.1   | 0.0       | 0.1    | 0.1  | 0.0     | 0.0   | 0.0      | 99.7                       | 140.7                                                 |                                                       |  |
| 30    |         | 841                 | 8                 | 9.2       | 6.4                 | 2.7    | 0.3   | 0.0       | 0.1    | 0.1  | 0.0     | 0.0   | 0.1      | 100.7                      | 272.3                                                 |                                                       |  |
| 31    |         | 1651                | 0                 | -2.9      | 0.1                 | 0.0    | 0.0   | 0.0       | 0.1    | 0.0  | 0.0     | 0.0   | 0.0      | 103.1                      | 10.9                                                  | 43.0                                                  |  |
| 32    |         | 1638                | 6                 | 1.5       | 3.2                 | 1.1    | 0.1   | 0.0       | 0.1    | 0.1  | 0.0     | 0.0   | 0.1      | 103.1                      | 255.3                                                 |                                                       |  |
| 33    |         | 1628                | 12                | 6.5       | 6.5                 | 2.6    | 0.3   | 0.0       | 0.1    | 0.1  | 0.0     | 0.0   | 0.1      | 103.3                      | 526.4                                                 |                                                       |  |

<sup>a</sup>Conditions: guaiacol (2-10 mmol), Pd/TiO<sub>2</sub> (Pd = 3 wt%, 100 mg), solvent (10 g), 373 K, H<sub>2</sub> (1 MPa at r.t.).

2-MCO: 2-methoxycyclohexanone, 2-MCol: 2-methoxycyclohexanol, CHone: cyclohexanone, MeOH: methanol, MeOCHane: Methoxycyclohexane, CHol: cyclohexanol, 2-HCO: 2-hydroxycyclohexanone.

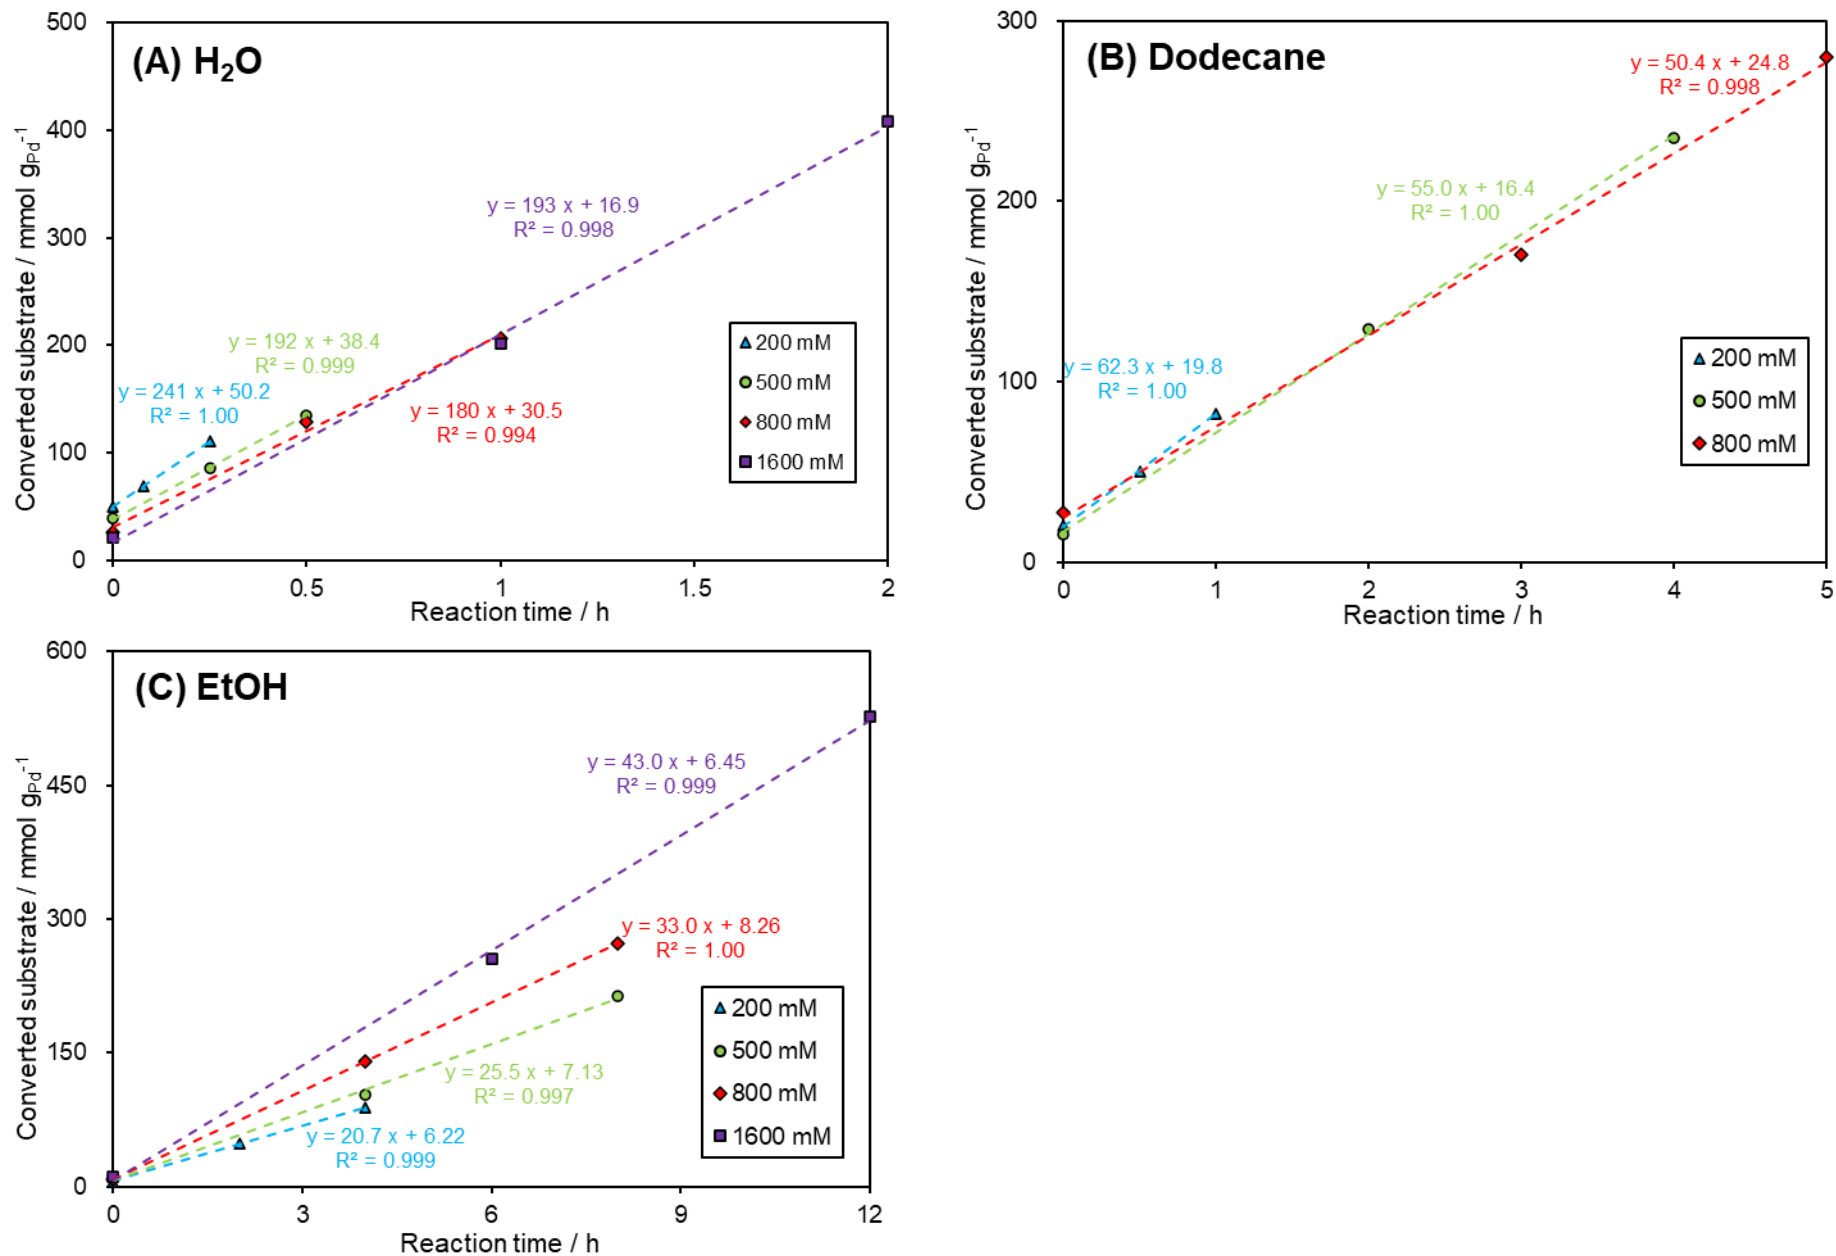

**Figure S2.** Effect of solvent and substrate concentration on selective hydrogenation of guaiacol over Pd/TiO<sub>2</sub> catalyst. Conditions: guaiacol (2-16 mmol), Pd/TiO<sub>2</sub> (Pd=3 wt%, 100 mg), solvent (10 g), H<sub>2</sub> (1 MPa at r.t.), 373 K.

**Table S11.** Effects of reaction temperature and hydrogen pressure on selective hydrogenation of guaiacol over Pd/TiO<sub>2</sub> catalyst.<sup>a</sup>

| Entry | Temp. [K] | $P_{H_2}$ [MPa] | Time [h] | Conv. [%] | Yield (C-based) [%] |                    |                      |       |           |        |      |         | 2-MCO sel. [%] | C.B. [%] |       |       |
|-------|-----------|-----------------|----------|-----------|---------------------|--------------------|----------------------|-------|-----------|--------|------|---------|----------------|----------|-------|-------|
|       |           |                 |          |           | 2-MCO               | <i>cis</i> -2-MCol | <i>trans</i> -2-MCol | CHone | MeO CHane | Phenol | CHol | Anisole |                |          | 2-HCO | MeOH  |
| 1     | 353       | 1               | 10       | 41.0      | 29.3                | 2.3                | 1.1                  | 1.3   | 0.1       | 0.0    | 0.1  | 0.1     | 0.0            | 0.3      | 84.7  | 96.5  |
| 2     |           |                 | 48       | 70.5      | 42.5                | 17.1               | 8.7                  | 2.1   | 0.6       | 0.2    | 1.5  | 0.1     | 0.0            | 0.5      | 58.0  | 102.8 |
| 3     | 373       | 1               | 4        | 40.6      | 29.6                | 3.6                | 2.1                  | 2.0   | 0.2       | 0.1    | 0.2  | 0.1     | 0.1            | 0.4      | 77.1  | 97.9  |
| 4     |           |                 | 12       | 71.0      | 55.6                | 8.0                | 3.9                  | 3.3   | 0.5       | 0.1    | 0.7  | 0.1     | 0.1            | 0.7      | 76.2  | 102.0 |
| 5     | 393       | 1               | 1.5      | 42.3      | 32.1                | 2.7                | 1.4                  | 3.0   | 0.2       | 0.2    | 0.2  | 0.3     | 0.1            | 0.5      | 78.9  | 98.4  |
| 6     |           |                 | 3        | 81.2      | 55.0                | 9.4                | 5.1                  | 6.8   | 0.7       | 0.1    | 0.8  | 0.3     | 0.2            | 1.3      | 69.0  | 98.4  |
| 7     | 373       | 0.1             | 4        | 21.9      | 13.9                | 0.8                | 0.4                  | 1.2   | 0.1       | 0.1    | 0.0  | 0.1     | 0.0            | 0.2      | 82.7  | 95.0  |
| 8     |           |                 | 6        | 41.5      | 27.0                | 3.3                | 1.8                  | 2.0   | 0.2       | 0.1    | 0.3  | 0.1     | 0.1            | 0.4      | 76.5  | 93.7  |
| 9     |           | 1               | 4        | 40.6      | 29.6                | 3.6                | 2.1                  | 2.0   | 0.2       | 0.1    | 0.2  | 0.1     | 0.1            | 0.4      | 77.1  | 97.9  |
| 10    |           | 3               | 4        | 45.2      | 28.3                | 5.1                | 2.8                  | 1.8   | 0.2       | 0.1    | 0.3  | 0.1     | 0.1            | 0.3      | 72.4  | 94.0  |
| 11    |           | 5               | 4        | 43.1      | 26.9                | 6.4                | 3.4                  | 1.6   | 0.2       | 0.1    | 0.4  | 0.1     | 0.0            | 0.3      | 68.3  | 96.3  |

<sup>a</sup>Conditions: guaiacol (5 mmol), catalyst (Pd = 3 wt%, 100 mg), water (10 g).

2-MCO: 2-methoxycyclohexanone, 2-MCol: 2-methoxycyclohexanol, CHone: cyclohexanone, MeOH: methanol, MeOCHane: methoxycyclohexane, CHol: cyclohexanol, 2-HCO: 2-hydroxycyclohexanone.



**Table S12.** Reusability of Pd/TiO<sub>2</sub> catalyst in selective hydrogenation of guaiacol.<sup>a</sup>

| Entry | Regeneration method  | Number of catalyst use | Conv. [%] | Yield (C-based) [%] |                    |                      |       |           |        |      |         |       | 2-MCO sel. [%] | C.B. [%] |       |
|-------|----------------------|------------------------|-----------|---------------------|--------------------|----------------------|-------|-----------|--------|------|---------|-------|----------------|----------|-------|
|       |                      |                        |           | 2-MCO               | <i>cis</i> -2-MCol | <i>trans</i> -2-MCol | CHone | MeO Chane | Phenol | CHol | Anisole | 2-HCO |                |          | MeOH  |
| 1     | Washing with water   | 1                      | 64.7      | 47.1                | 8.3                | 4.1                  | 3.9   | 0.6       | 0.1    | 0.7  | 0.2     | 0.1   | 0.7            | 71.6     | 101.1 |
| 2     |                      | 2                      | 57.0      | 43.6                | 5.4                | 2.7                  | 3.5   | 0.6       | 0.1    | 0.3  | 0.2     | 0.3   | 0.6            | 76.1     | 100.3 |
| 3     |                      | 3                      | 37.0      | 26.2                | 2.1                | 0.9                  | 2.2   | 0.2       | 0.1    | 0.1  | 0.1     | 0.1   | 0.4            | 80.9     | 95.4  |
| 4     | Calcination at 573 K | 1                      | 63.5      | 48.2                | 7.3                | 3.9                  | 3.7   | 0.5       | 0.1    | 0.6  | 0.1     | 0.0   | 0.6            | 74.2     | 101.5 |
| 5     |                      | 2                      | 55.1      | 44.3                | 5.9                | 3.1                  | 3.3   | 0.5       | 0.1    | 0.4  | 0.1     | 0.1   | 0.6            | 75.9     | 103.1 |
| 6     |                      | 3                      | 42.8      | 33.4                | 3.9                | 2.0                  | 2.8   | 0.2       | 0.2    | 0.1  | 0.2     | 0.1   | 0.5            | 77.0     | 100.6 |
| 7     | Washing with toluene | 1                      | 62.9      | 45.6                | 7.1                | 3.6                  | 3.8   | 0.6       | 0.1    | 0.5  | 0.2     | 0.1   | 0.6            | 73.3     | 99.3  |
| 8     |                      | 2                      | 69.5      | 50.3                | 7.9                | 3.9                  | 4.6   | 0.8       | 0.1    | 0.5  | 0.2     | 0.3   | 0.9            | 72.4     | 100.0 |
| 9     |                      | 3                      | 64.0      | 47.4                | 6.8                | 3.3                  | 4.7   | 0.9       | 0.1    | 0.4  | 0.2     | 0.5   | 1              | 72.6     | 101.3 |

<sup>a</sup>Conditions: guaiacol (5 mmol), catalyst (Pd = 3 wt%, 200 mg), water (10 g), 373 K, H<sub>2</sub> (1 MPa at r.t.), 4 h.

2-MCO: 2-methoxycyclohexanone, 2-MCol: 2-methoxycyclohexanol, CHone: cyclohexanone, MeOH: methanol, MeOCHane: methoxycyclohexane, CHol: cyclohexanol, 2-HCO: 2-hydroxycyclohexanone.

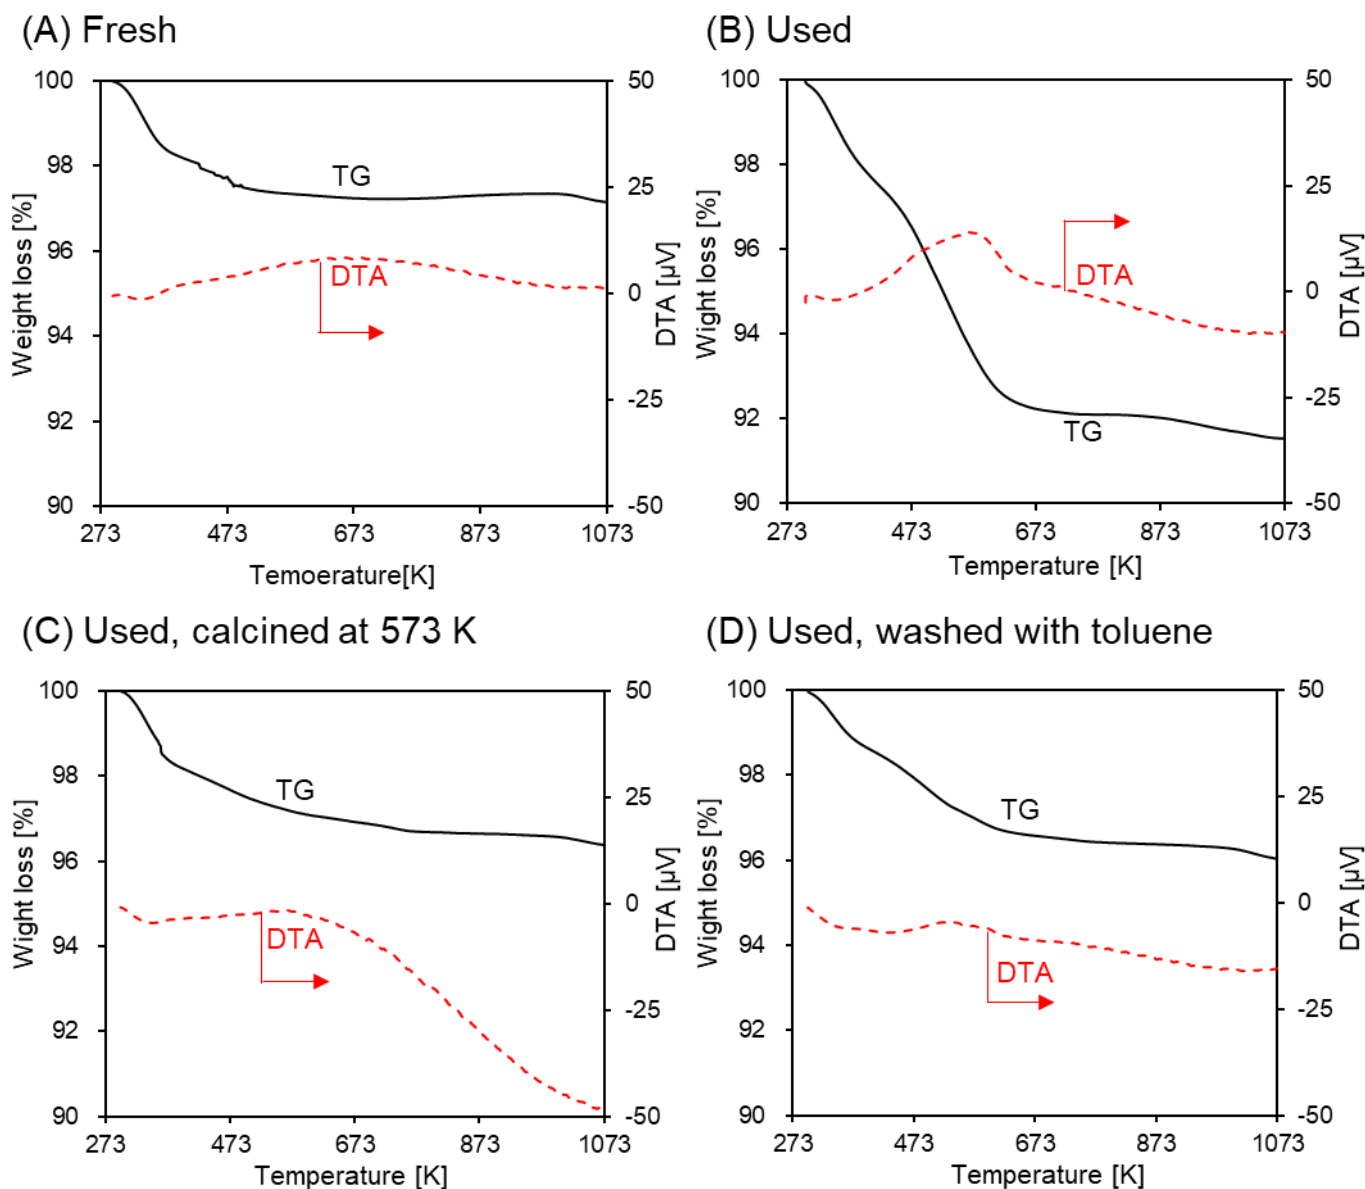

**Figure S3.** TG-DTA profiles for Pd/TiO<sub>2</sub> catalysts.

Reaction conditions: guaiacol (5 mmol), Pd/TiO<sub>2</sub> (Pd = 3 wt%, 200 mg), water (10 g), 373 K, H<sub>2</sub> (1 MPa at r.t.), 4 h.

Measurement conditions: 10 mg sample heated from room temperature to 1073 K under an air flow of 30 mL min<sup>-1</sup> at a ramp rate of 10 K min<sup>-1</sup>.

(A) The fresh catalyst was washed with water and dried at 383 K for 12 h.

(B) The used catalyst was washed with water and dried at 383 K for 12 h.

(C) The used catalyst was washed with water, dried at 383 K for 12 h and calcined at 573 K for 3 h.

(D) The used catalyst was washed with water and toluene and dried at 383 K for 12 h.

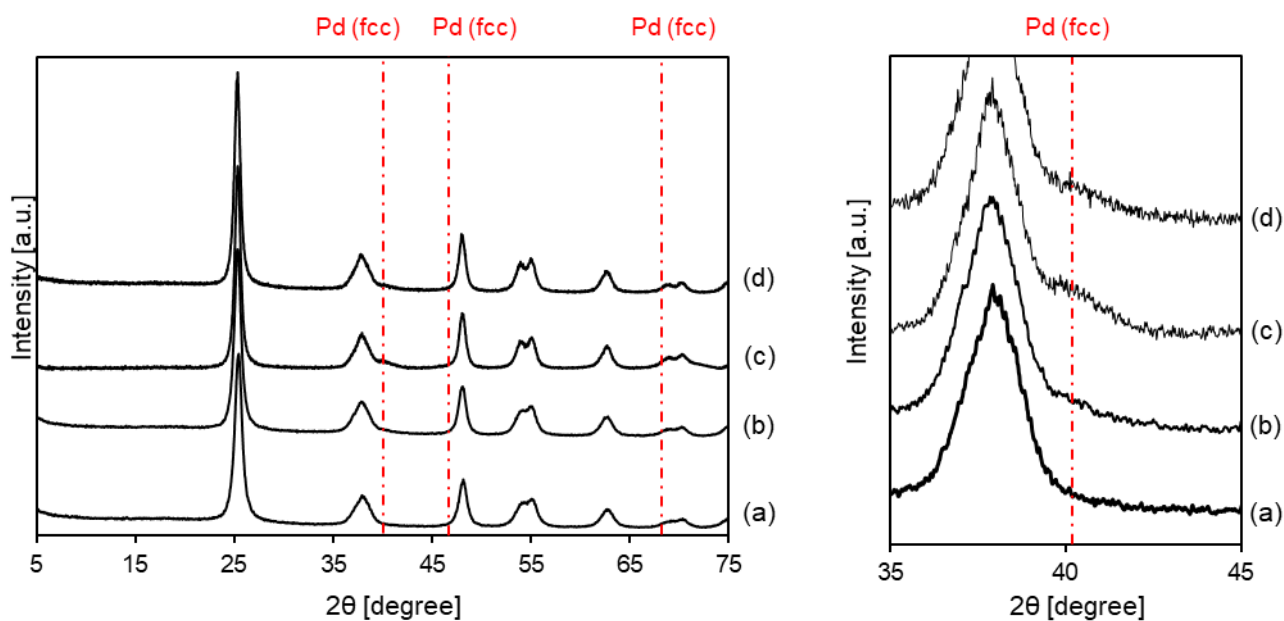

**Figure S4.** XRD patterns of Pd/TiO<sub>2</sub> catalysts after reuse.

Reaction conditions: guaiacol (5 mmol), Pd/TiO<sub>2</sub> (Pd = 3 wt%, 200 mg), water (10 g), 373 K, H<sub>2</sub> (1 MPa at r.t.), 4 h. Measured after liquid phase reduction (373 K) and dried at 383 K for 12 h.

Pd (fcc) was referred to ICSD (52251).

- (a) Anatase TiO<sub>2</sub> calcined at 573 K for 3 h.
- (b) The fresh catalyst
- (c) The twice used catalyst: regenerated by calcination at 573 K.
- (d) The twice used catalyst: regenerated by washing toluene.

**Table S13.** Change of Pd dispersion by catalyst regeneration of calcination at 573 K.<sup>a</sup>

| Number of catalyst use | Dispersion [%] |
|------------------------|----------------|
| 1                      | 24.4           |
| 2                      | 22.4           |
| 3                      | 14.9           |

<sup>a</sup>Reaction conditions: guaiacol (5 mmol), Pd/TiO<sub>2</sub> (Pd = 3 wt%, 200 mg), water (10 g), 373 K, H<sub>2</sub> (1 MPa at r.t.), 4 h. Regeneration method: washing by water and dried at 383 K for 12 h, calcined at 573 K for 3 h.

$$\text{Dispersion (\%)} = \left[ \frac{\text{Amount (mol) of adsorbed CO}}{\text{Total amount (mol) of Pd}} \right] \times 100$$

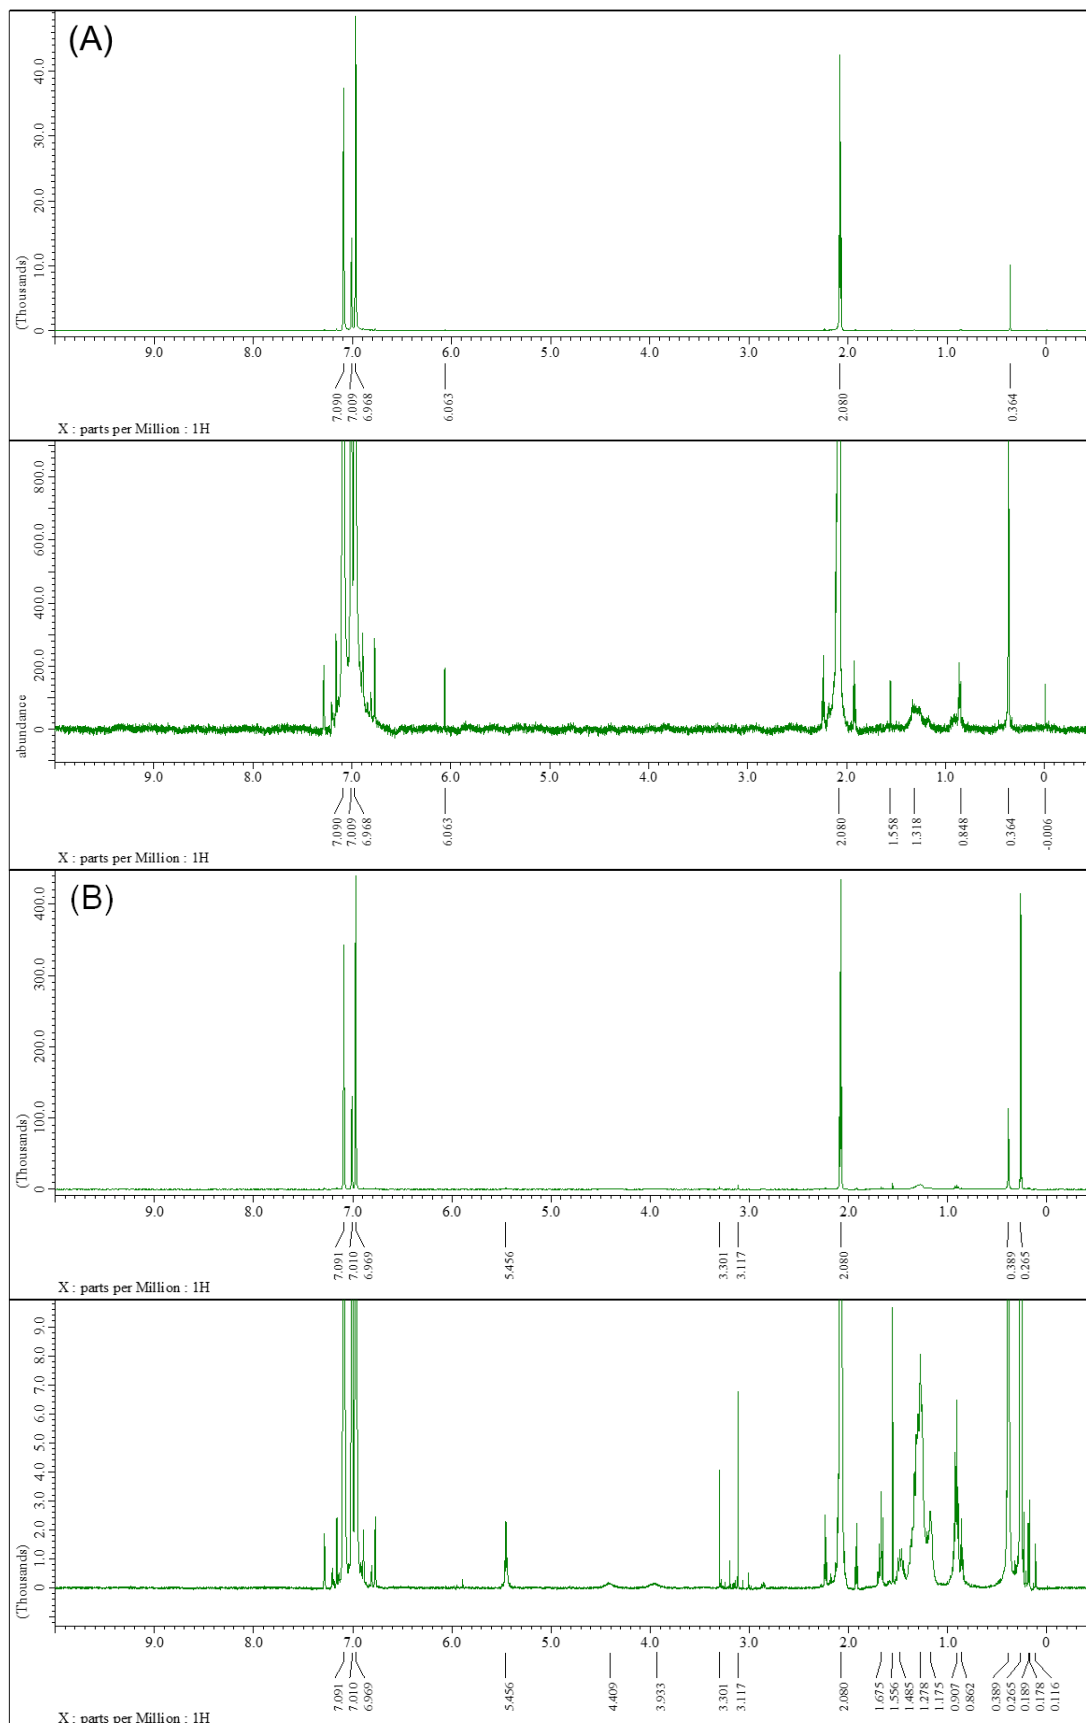

**Figure S5.**  $^1\text{H}$  NMR spectra of organic species extracted from the used catalyst with toluene- $d_8$ :

for the figure A and B, the upper and bottom spectra represent the whole range and expanded ones.

(A) Toluene- $d_8$  (as a reference)

(B) Organic species extracted from the used catalyst with toluene- $d_8$

Spectrum B: After the reaction, the used catalyst (0.3 g) collected by filtration, washed with water (30 g), and dried at 383 K overnight, the organic species were extracted with 2 mL of toluene- $d_8$ .

Reaction conditions: guaiacol (5 mmol), Pd/TiO<sub>2</sub> (Pd = 3 wt%, 200 mg), water (10 g), 373 K, H<sub>2</sub> (1 MPa at r.t.), 4 h.

**Table S14.** Substrate scope of Pd/TiO<sub>2</sub> catalyst.<sup>a</sup>

| Substrate                                                                           | Time [h] | Conv. [%] | Yield of each product (C based) [%]                                                 |      |  |                                                                                       |  |                                                                                       |     |                                                                                       |     |
|-------------------------------------------------------------------------------------|----------|-----------|-------------------------------------------------------------------------------------|------|--|---------------------------------------------------------------------------------------|--|---------------------------------------------------------------------------------------|-----|---------------------------------------------------------------------------------------|-----|
| 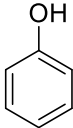   | 0        | 15.7      |                                                                                     | 15.8 |  |                                                                                       |  |                                                                                       |     | n.d.                                                                                  |     |
|                                                                                     | 0.25     | 27.5      |                                                                                     | 27.6 |  |    |  |                                                                                       |     | n.d.                                                                                  |     |
|                                                                                     | 0.50     | 49.5      |    | 50.3 |  |    |  |                                                                                       |     | n.d.                                                                                  |     |
|                                                                                     | 1        | 99.4      |    | 86.6 |  |    |  |                                                                                       |     | 7.5                                                                                   |     |
|                                                                                     | 2.5      | 99.8      |                                                                                     | 77.9 |  |                                                                                       |  |                                                                                       |     | 27.4                                                                                  |     |
|    | 0        | 5.5       |                                                                                     | 1.6  |  |                                                                                       |  |                                                                                       | 0.1 | Others <sup>b</sup>                                                                   | 0.4 |
|                                                                                     | 0.25     | 8.5       |    | 4.5  |  |    |  |    | 0.2 |                                                                                       | 0.0 |
|                                                                                     | 0.50     | 11.3      |    | 6.8  |  |    |  |    | 0.3 |                                                                                       | 0.4 |
|                                                                                     | 4        | 40.6      |    | 29.6 |  |    |  |    | 2.0 |                                                                                       | 1.2 |
|                                                                                     | 16       | 93.8      |                                                                                     | 65.1 |  |                                                                                       |  |    | 3.7 |                                                                                       | 2.5 |
|    | 0        | 12.2      |                                                                                     | 11.1 |  |                                                                                       |  |                                                                                       | 0.2 | Others <sup>c</sup>                                                                   | 0.2 |
|                                                                                     | 0.25     | 23.2      |    | 19.5 |  |    |  |    | 0.6 |                                                                                       | 0.3 |
|                                                                                     | 0.50     | 36.8      |    | 37.1 |  |    |  |    | 1.5 |                                                                                       | 0.3 |
|                                                                                     | 1        | 75.4      |   | 74.3 |  |   |  |   | 2.4 |                                                                                       | 0.8 |
|                                                                                     | 1.5      | 90.9      |   | 90.2 |  |   |  |   | 3.9 |                                                                                       | 0.7 |
|                                                                                     | 2        | 96.2      |                                                                                     | 90.5 |  |                                                                                       |  |   | 4.2 |                                                                                       | 0.3 |
| 4                                                                                   | 99.8     |           | 29.5                                                                                |      |  |                                                                                       |  | 2.4                                                                                   |     | 1.9                                                                                   |     |
|  | 0        | 4.3       |                                                                                     | 1.6  |  |                                                                                       |  |                                                                                       | 0.0 |                                                                                       | 0.1 |
|                                                                                     | 0.25     | 7.7       |  | 3.3  |  |  |  |  | 0.2 |  | 0.1 |
|                                                                                     | 0.50     | 12.2      |  | 6.3  |  |  |  |  | 0.3 |  | 0.2 |
|                                                                                     | 4        | 37.4      |  | 26.8 |  |  |  |  | 1.6 |  | 0.3 |
|                                                                                     | 16       | 92.9      |                                                                                     | 51.3 |  |                                                                                       |  |  | 3.9 |  | 0.8 |

| Substrate                                                                          | Time [h] | Conv. [%] | Yield of each product (C based) [%]                                                |      |                                                                                      |      |                                                                                     |      |                     |      |
|------------------------------------------------------------------------------------|----------|-----------|------------------------------------------------------------------------------------|------|--------------------------------------------------------------------------------------|------|-------------------------------------------------------------------------------------|------|---------------------|------|
| 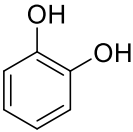  | 0        | 8.4       |                                                                                    | 8.7  |                                                                                      | 0.3  |                                                                                     | n.d. |                     |      |
|                                                                                    | 0.25     | 27.1      |                                                                                    | 20.9 |                                                                                      | 1.2  |                                                                                     | n.d. |                     |      |
|                                                                                    | 0.5      | 43.7      |                                                                                    | 46.5 |                                                                                      | 2.3  |                                                                                     | n.d. |                     |      |
|                                                                                    | 1        | 64.1      |   | 55.1 |   | 3.7  |  | 0.5  |                     |      |
|                                                                                    | 2        | 94.6      |                                                                                    | 87.0 |                                                                                      | 6.7  |                                                                                     | 5.5  |                     |      |
|   | 0        | 10.6      |                                                                                    | 6.0  |                                                                                      |      |                                                                                     | n.d. |                     |      |
|                                                                                    | 0.25     | 21.2      |                                                                                    | 18.6 |                                                                                      | 0.2  |                                                                                     |      |                     |      |
|                                                                                    | 0.50     | 35.8      |                                                                                    | 32.3 |                                                                                      | 0.3  |                                                                                     |      |                     |      |
|                                                                                    | 2        | 67.0      |   | 59.9 |   | 1.0  |                                                                                     |      |                     |      |
|                                                                                    | 4        | 93.9      |                                                                                    | 83.2 |                                                                                      | 4.3  |                                                                                     |      |                     |      |
|   | 0        | 10.0      |                                                                                    | 5.9  |                                                                                      |      |                                                                                     | 1.8  |                     |      |
|                                                                                    | 0.25     | 23.2      |                                                                                    | 16.5 |                                                                                      | 5.1  |                                                                                     |      |                     |      |
|                                                                                    | 0.50     | 35.5      |   | 26.2 |   | 6.9  |                                                                                     |      |                     |      |
|                                                                                    | 4        | 96.2      |                                                                                    | 83.2 |                                                                                      | 11.8 |                                                                                     |      |                     |      |
|  | 0.5      | 4.2       |                                                                                    | 0.1  |                                                                                      | 0.3  |                                                                                     | 0.1  | Others <sup>d</sup> |      |
|                                                                                    | 6        | 9.8       |  | 1.1  |                                                                                      | 2.1  |                                                                                     | 0.8  |                     | 2.5  |
|                                                                                    | 11       | 13.8      |                                                                                    | 2.4  |  | 2.4  |                                                                                     | 1.4  |                     | 4.2  |
|                                                                                    | 24       | 28.8      |                                                                                    | 7.4  |                                                                                      | 6.5  |                                                                                     | 5.7  |                     | 10.0 |
|                                                                                    |          |           |                                                                                    |      |                                                                                      |      |                                                                                     |      |                     |      |

<sup>a</sup>Conditions: substrate (5 mmol), Pd/TiO<sub>2</sub> (Pd = 3 wt%, 100 mg), water (10 g), 373 K, H<sub>2</sub> (1 MPa at r.t.).

n.d.: not detected.

b (guaiacol): others include methanol, cyclohexanol, phenol, anisole, methoxycyclohexane, 2-hydroxycyclohexanone.

c (4-methoxyphenol): others include methanol, cyclohexanol, and 1,4-cyclohexanediol.

d (syringol): others include methanol, 2-methoxycyclohexanol, 2-hydroxycyclohexanone, 1,2-cyclohexanediol.

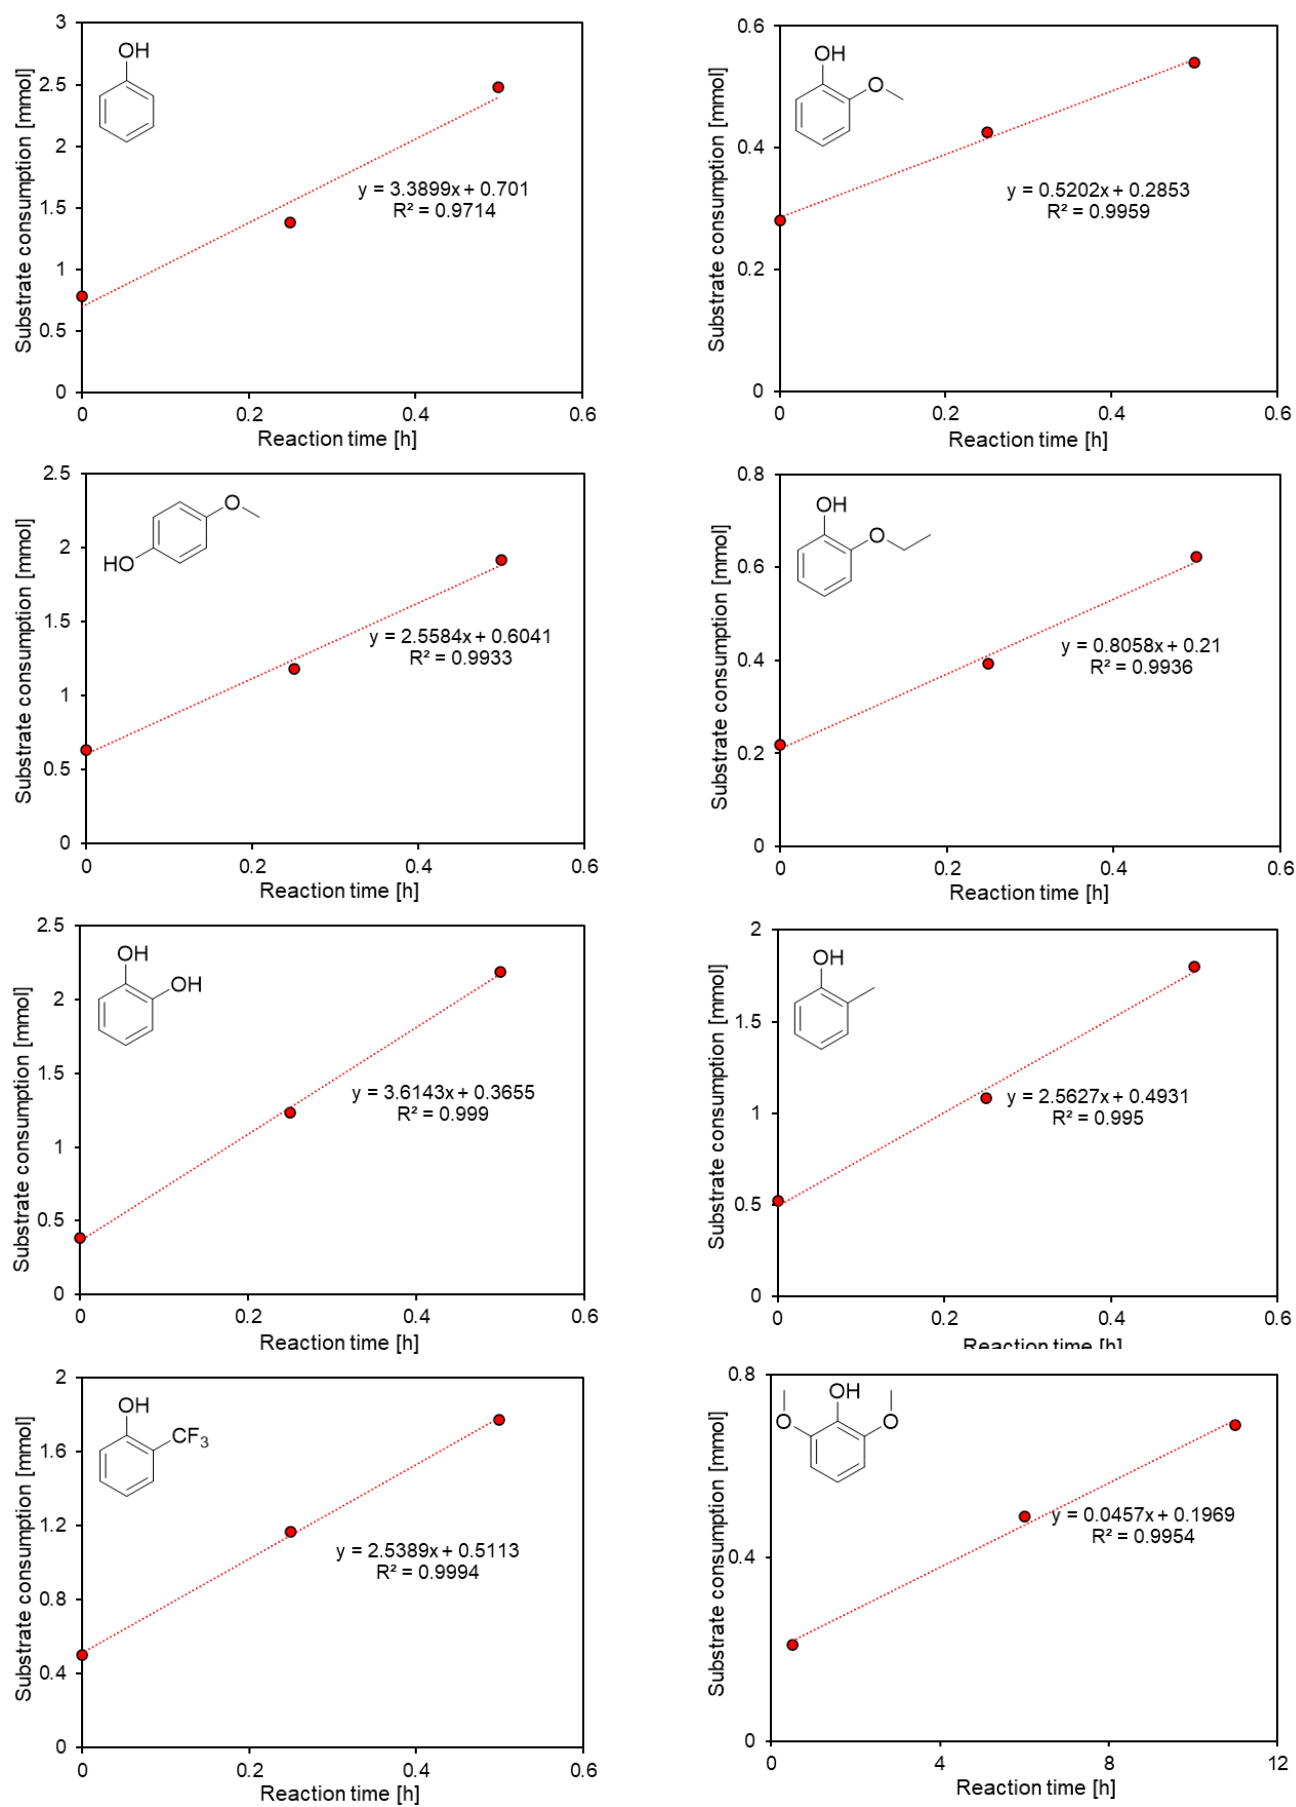

**Figure S6.** Initial reaction rate of selective hydrogenation of each substrate over Pd/TiO<sub>2</sub> catalyst.

Conditions: substrate (5 mmol), Pd/TiO<sub>2</sub> (Pd = 3 wt%, 100 mg), water (1.0 g), 373 K, H<sub>2</sub> (1 MPa at r.t.)

**Table S15.** Hydrogenation of guaiacol and 2-methoxycyclohexanone (2-MCO) over Pd/TiO<sub>2</sub> catalyst.<sup>a</sup>

| Entry | Substrate         | Time [h] | Conv. [%] | Yield (C-based) [%] |                   |                     |       |           |        | Anisole | 2-HCO | MeOH | <i>cis/trans</i> ratio of 2-MCO [mol/mol] | C.B. [%] |       |
|-------|-------------------|----------|-----------|---------------------|-------------------|---------------------|-------|-----------|--------|---------|-------|------|-------------------------------------------|----------|-------|
|       |                   |          |           | 2-MCO               | <i>cis</i> -2-MCO | <i>trans</i> -2-MCO | CHone | MeO CHane | Phenol |         |       |      |                                           |          |       |
| 1     | Guaiacol (5 mmol) | 4        | 40.6      | 29.6                | 3.6               | 2.1                 | 2.0   | 0.2       | 0.1    | 2.0     | 0.1   | 0.2  | 0.2                                       | 1.7      | 98.3  |
| 2     |                   | 8        | 57.6      | 47.3                | 5.5               | 2.8                 | 3.3   | 0.4       | 0.0    | 0.4     | 0.1   | 0.1  | 0.5                                       | 2.0      | 102.9 |
| 3     |                   | 12       | 71.0      | 55.6                | 8.0               | 3.9                 | 3.3   | 0.5       | 0.1    | 0.7     | 0.1   | 0.1  | 0.7                                       | 2.1      | 102.0 |
| 4     |                   | 24       | 99.9      | 7.6                 | 49.0              | 33.1                | 1.5   | 1.3       | 0.1    | 6.3     | 0.0   | 0.0  | 1.2                                       | 1.5      | 100.3 |
| 5     | 2-MCO (2 mmol)    | 1        | 38.9      | -                   | 18.9              | 18.5                | 0.2   | 0.0       | 0.0    | 0.1     | 0.0   | 0.0  | 0.5                                       | 1.0      | 99.3  |
| 6     |                   | 2        | 53.7      | -                   | 28.2              | 25.5                | 0.2   | 0.1       | 0.0    | 0.1     | 0.0   | 0.0  | 0.5                                       | 1.1      | 101.4 |
| 7     |                   | 6        | 81.7      | -                   | 46.3              | 38.2                | 0.2   | 0.1       | 0.0    | 0.2     | 0.0   | 0.0  | 0.6                                       | 1.2      | 103.9 |

<sup>a</sup>Conditions for guaiacol: guaiacol (5 mmol), water (10 g), Pd/TiO<sub>2</sub> (Pd = 3 wt%, 100 mg), H<sub>2</sub> (1 MPa at r.t.), 373 K.

Conditions for 2-MCO: 2-MCO (2 mmol), water (10 g), Pd/TiO<sub>2</sub> (Pd = 3 wt%, 50 mg), H<sub>2</sub> (1 MPa at r.t.), 373 K.



## References

- S1. H. Wang, W. Wang, R. Wang, X. Jiang, W. Li, Z. He, K. Wang, Y. Yang, Q. Li and Z. Liu, *Appl. Catal., A*, 2024, **670**, 119520.
- S2. J. Zhang, H. Zhao, L. Yang, H. Jiang, Y. Du and R. Chen, *Appl. Catal., A*, 2023, **666**, 119428.
- S3. Z. Wang, B. Ye, R. Zhou, Z. Zhong, P. Chen and Z. Hou, *Appl. Catal., A*, 2023, **657**, 119144.
- S4. D. Yin, J. Zhang, S. Yu, L. Li, S. Liu, L. Jiang, Z. Song and Y. Liu, *Fuel*, 2023, **333**, 126481.
- S5. D. Yin, R. Ji, F. Lv, L. Jiang, J. Zhang, M. Liu, Z. Jia, S. Yu, R. Zhao and Y. Liu, *Fuel*, 2023, **332**, 126060.
- S6. S. Wang, L. Yang, T. Zhu, N. Jiang, F. Li, H. Wang, C. Zhang and H. Song, *React. Chem. Eng.*, 2022, **7**, 170-180.
- S7. X. Zhu, J. Zhang, H. Jiang and R. Chen, *Appl. Catal., A*, 2022, **634**, 118538.
- S8. F. Zhang, C. Wu, S. Wang, S. Wang, T. Li, L. Zou, L. Zou, H. Yu and H. Yin, *Catal. Sci. Technol.*, 2022, **12**, 2257-2264.
- S9. D. Yin, R. Ji, S. Yu, L. Li, S. Liu, L. Jiang and Y. Liu, *Mol. Catal.*, 2022, **530**, 112526.
- S10. C. Yang, K. Li, J. Wang and S. Zhou, *Appl. Catal., A*, 2021, **610**, 117961.
- S11. Y. Wang, J. Yao, H. Li, D. Su and M. Antonietti, *J. Am. Chem. Soc.*, 2011, **133**, 2362-2365.
- S12. Y. Shao, J. Zhang, H. Jiang and R. Chen, *Ind. Eng. Chem. Res.*, 2021, **60**, 5806-6815.
- S13. H. Li, T. She, G. Chen, M. Sun, L. Niu and G. Bia, *Mol. Catal.*, 2021, **504**, 111493.
- S14. S. Xu, J. Du, Q. Zhou, H. Li, C. Wang and J. Tang, *J. Colloid Interface Sci.*, 2021, **604**, 876-884.
- S15. M. Aliahmadi, M. Davoudi and A. N. Kharat, *React. Kinet., Mech. Catal.*, 2020, **131**, 819-828.
- S16. J. Zhang, C. Zhang, H. Jiang, Y. Liu and R. Chen, *Ind. Eng. Chem. Res.*, 2020, **59**, 10768-10777.
- S17. J. Dong, X. Wen, T. Zhu, J. Qin, Z. Wu, L. Chen and G. Bai, *Mol. Catal.*, 2020, **485**, 110846.
- S18. P. Yan, P. Tian, K. Li, M. A. C. Stuart, J. Wang, X. Yu and S. Zhou, *Chem. Eng. J.*, 2020, **397**, 125484.
- S19. H. Zhang, A. Han, K. Okumura, L. Zhong, S. Li, S. Jaenicke and G. K. Chuah, *J. Catal.*, 2018, **364**, 354-365.
- S20. K. J. Betsy, A. Lazar and C. P. Vinod, *Nano Struct. Nano Obj.*, 2018, **13**, 36-43.
- S21. S. Fehn, M. Zaheer, C. E. Denner, M. Friedrich and R. Kempe, *New J. Chem.*, 2016, **40**, 9252-9256.
- S22. G. Xu, J. Guo, Y. Zhang, Y. Fu, J. Chen, L. Ma and Q. Guo, *ChemCatChem*, 2015, **7**, 2485-2492.
- S23. A. Chen, G. Zhao, J. Chen, L. Chen and Y. Yu, *RSC Adv.*, 2013, **3**, 4171-4175.
- S24. A. Yamaguchi, Y. Murakami, K. Yamazaki, M. Shirai and N. Hiyoshi, *Catal. Today*, 2024, **425**, 114356.

S25. E. A. Karakhanov, M. P. Boronoev, T. Y. Filippova and A. L. Maksimov, *Petrol. Chem.*, 2018, **58**, 407

S26. Q. Meng, M. Hou, H. Liu, J. Song and B. Han, *Nat. Commun.*, 2017, **8**, 14190.

S27. J. Yi, Y. Luo, T. He, Z. Jiang, J. Li and C. Hu, *Catalysts*, 2016, **6**, 12.
